# Supplementary material
Source: PubMed Central journal article supplement (PMC9015693)
Supplement: NIHMS1776304-supplement-Supplementary_information.pdf [file NIHMS1776304-supplement-Supplementary_information.pdf]

Flow cytometry gating strategy for Fig. 1k and Fig. 3j

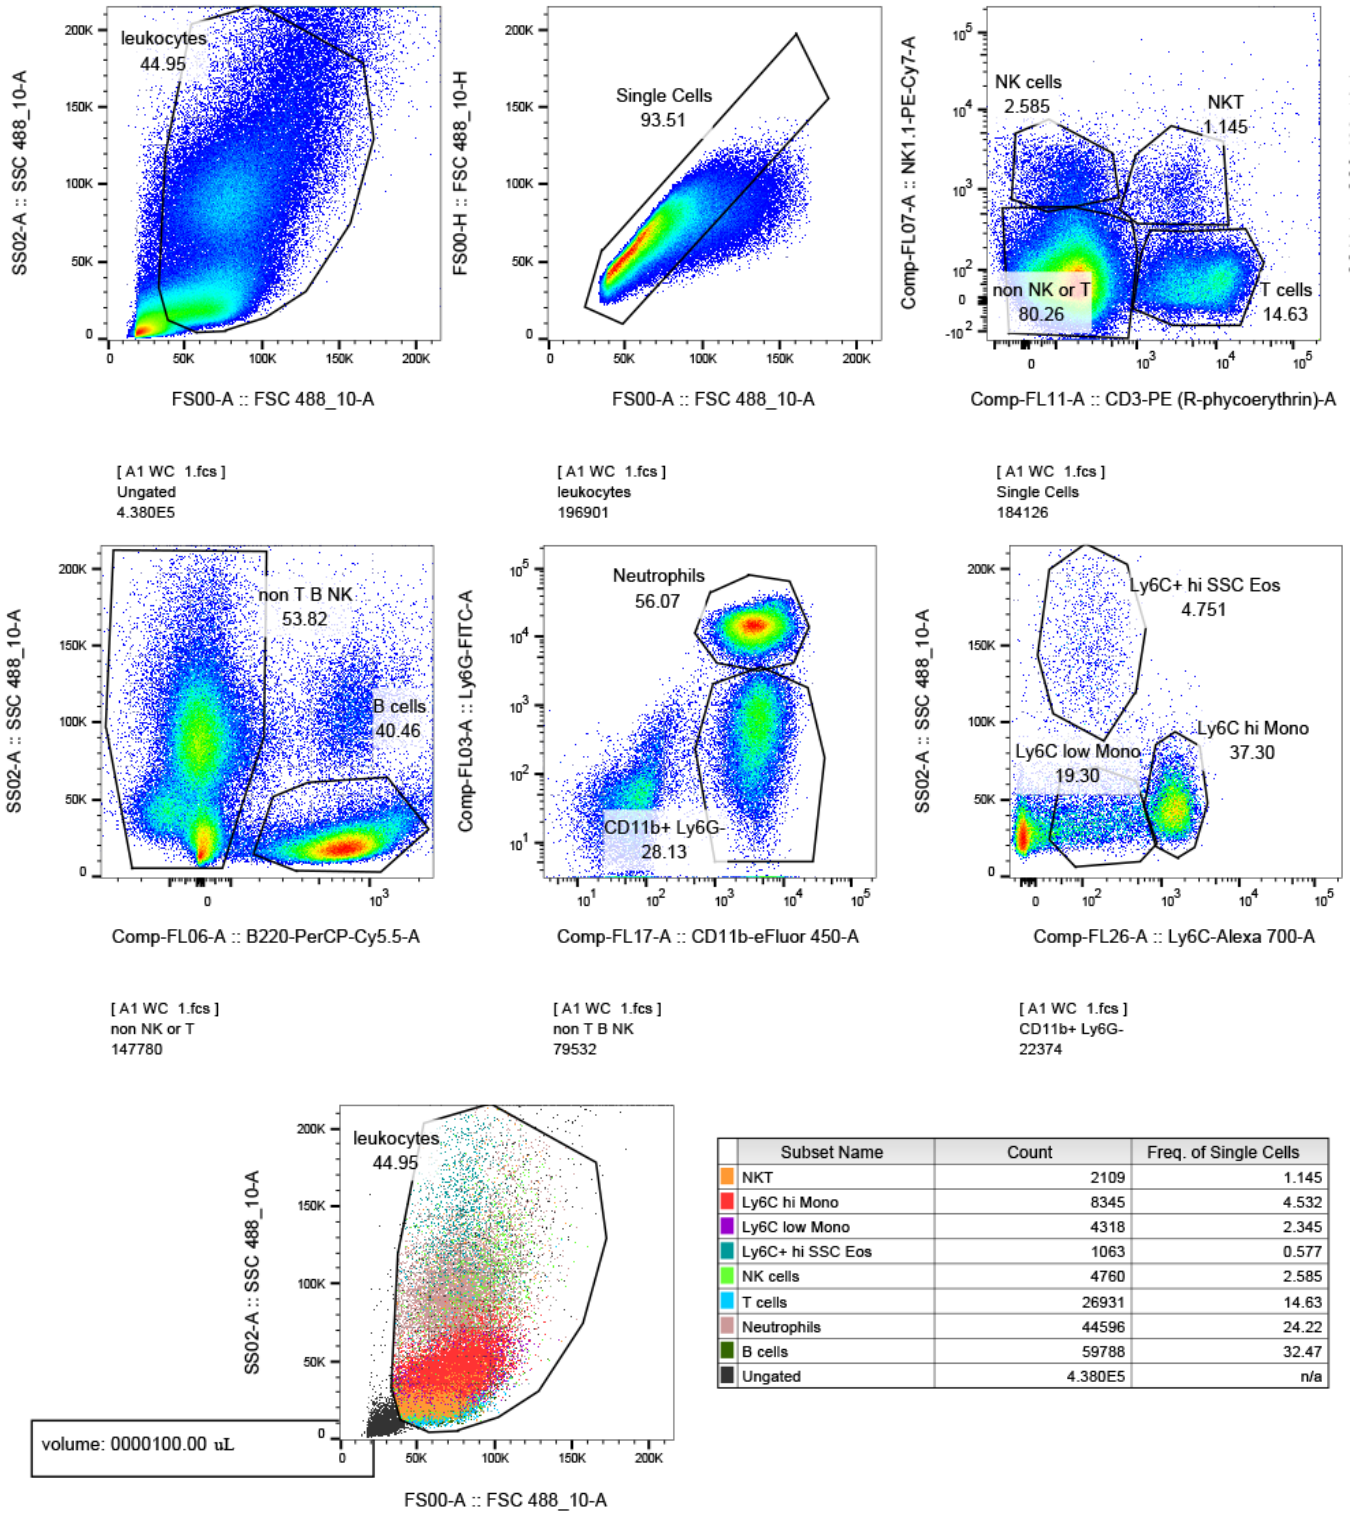

| Subset Name      | Count   | Freq. of Single Cells |
|------------------|---------|-----------------------|
| NKT              | 2109    | 1.145                 |
| Ly6C hi Mono     | 8345    | 4.532                 |
| Ly6C low Mono    | 4318    | 2.345                 |
| Ly6C+ hi SSC Eos | 1063    | 0.577                 |
| NK cells         | 4760    | 2.585                 |
| T cells          | 26931   | 14.63                 |
| Neutrophils      | 44596   | 24.22                 |
| B cells          | 59788   | 32.47                 |
| Ungated          | 4.380E5 | n/a                   |

Extended Data Fig. 1b-TRPM2

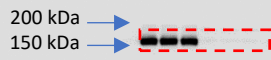

Extended Data Fig. 1b-Tubulin

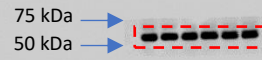

Extended Data Fig. 1g-TRPM2

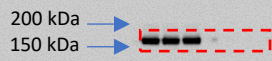

Extended Data Fig. 1g-Tubulin

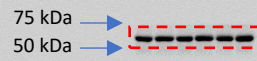

Uncropped scanned gel pictures for Extended Data Fig 1

Extended Data Fig. 2a-TRPM2

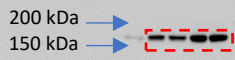

Extended Data Fig. 2a-Tubulin

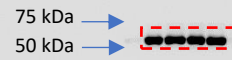

Extended Data Fig. 2c-TRPM2

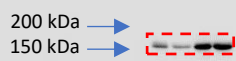

Extended Data Fig. 2c-Tubulin

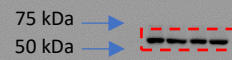

Uncropped scanned gel pictures for Extended Data Fig 2

Extended Data Fig. 4b-CD36

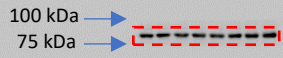

Extended Data Fig. 4b-pFyn

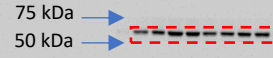

Extended Data Fig. 4b-Fyn

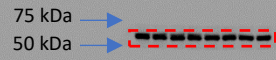

Extended Data Fig. 4b-pJNK

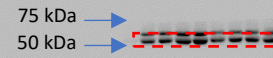

Extended Data Fig. 4b-JNK

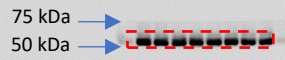

Extended Data Fig. 4b-pp38

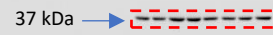

Extended Data Fig. 4b-p38

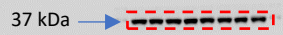

Extended Data Fig. 4b-GAPDH

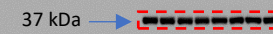

Uncropped scanned gel pictures for Extended Data Fig 4

Extended Data Fig. 4d-CD36

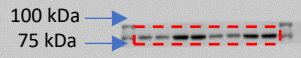

Extended Data Fig. 4d-pFyn

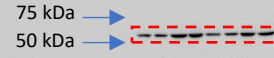

Extended Data Fig. 4d-Fyn

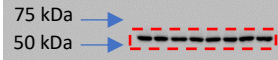

Extended Data Fig. 4d-pJNK

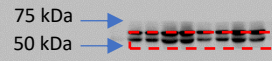

Extended Data Fig. 4d-JNK

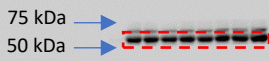

Extended Data Fig. 4d-pp38

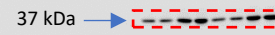

Extended Data Fig. 4d-p38

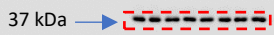

Extended Data Fig. 4d-GAPDH

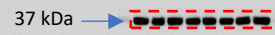

Uncropped scanned gel pictures for Extended Data Fig 4

Extended Data Fig. 4i-MCP1

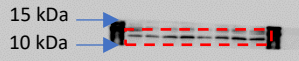

Extended Data Fig. 4i-MIF

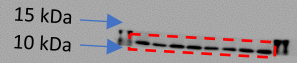

Extended Data Fig. 4i-GAPDH

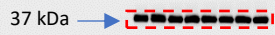

Uncropped scanned gel pictures for Extended Data Fig 4

Extended Data Fig. 5a-TRPM2

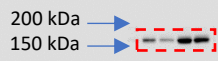

Extended Data Fig. 5a-Tubulin

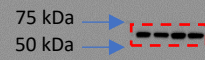

Uncropped scanned gel pictures for Extended Data Fig 5

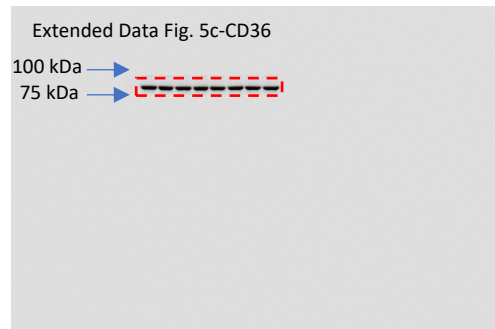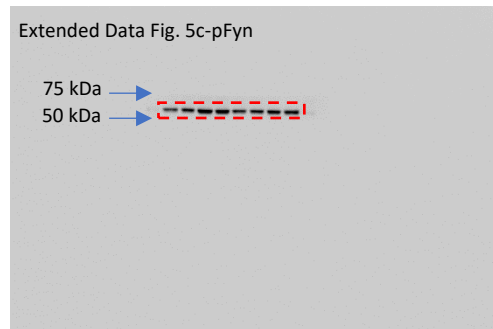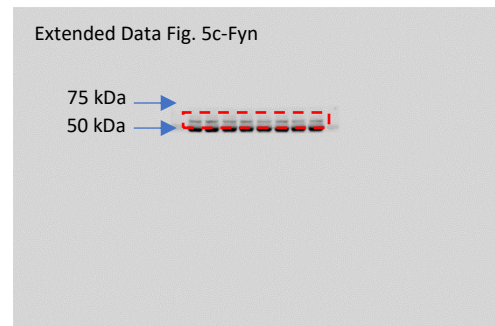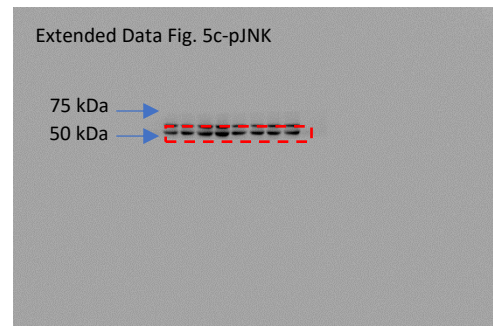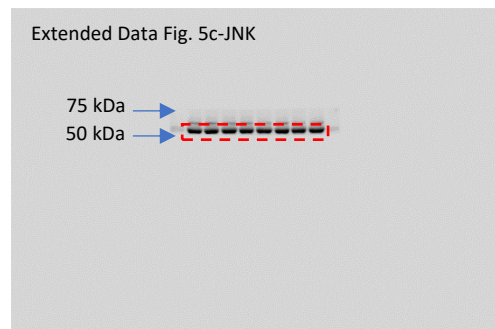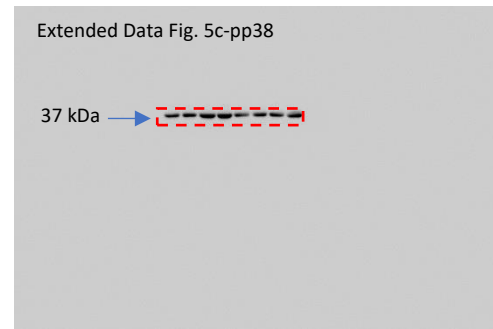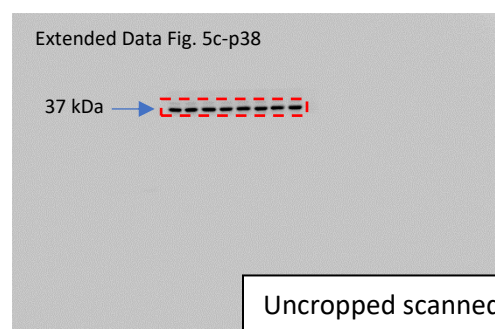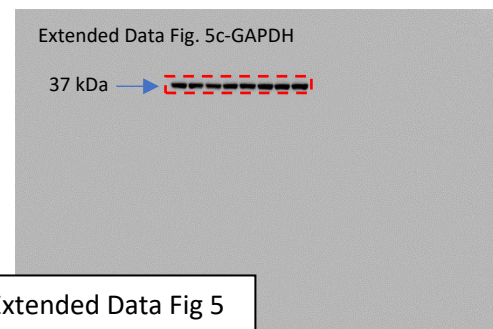

Uncropped scanned gel pictures for Extended Data Fig 5

Extended Data Fig. 5e- CD36

100 kDa →  
75 kDa →

A Western blot image for CD36. On the left, two blue arrows point to molecular weight markers: 100 kDa and 75 kDa. On the right, a red dashed box encloses a series of dark bands. The bands are most prominent at the 75 kDa position and extend slightly above and below it.

Extended Data Fig. 5e -pFyn

75 kDa →  
50 kDa →

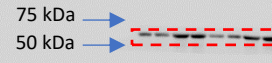A Western blot image for pFyn. On the left, two blue arrows point to molecular weight markers: 75 kDa and 50 kDa. On the right, a red dashed box encloses a series of dark bands. The bands are most prominent at the 50 kDa position and extend slightly above and below it.

Extended Data Fig. 5e -Fyn

75 kDa →  
50 kDa →

A Western blot image for Fyn. On the left, two blue arrows point to molecular weight markers: 75 kDa and 50 kDa. On the right, a red dashed box encloses a series of dark bands. The bands are most prominent at the 50 kDa position and extend slightly above and below it.

Extended Data Fig. 5e -pJNK

75 kDa →  
50 kDa →

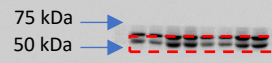A Western blot image for pJNK. On the left, two blue arrows point to molecular weight markers: 75 kDa and 50 kDa. On the right, a red dashed box encloses a series of dark bands. The bands are most prominent at the 50 kDa position and extend slightly above and below it.

Extended Data Fig. 5e -JNK

75 kDa →  
50 kDa →

A Western blot image for JNK. On the left, two blue arrows point to molecular weight markers: 75 kDa and 50 kDa. On the right, a red dashed box encloses a series of dark bands. The bands are most prominent at the 50 kDa position and extend slightly above and below it.

Extended Data Fig. 5e -pp38

37 kDa →

A Western blot image for pp38. On the left, a blue arrow points to a molecular weight marker: 37 kDa. On the right, a red dashed box encloses a series of dark bands. The bands are most prominent at the 37 kDa position and extend slightly above and below it.

Extended Data Fig. 5e -p38

37 kDa →

A Western blot image for p38. On the left, a blue arrow points to a molecular weight marker: 37 kDa. On the right, a red dashed box encloses a series of dark bands. The bands are most prominent at the 37 kDa position and extend slightly above and below it.

Extended Data Fig. 5e -GAPDH

37 kDa →

A Western blot image for GAPDH. On the left, a blue arrow points to a molecular weight marker: 37 kDa. On the right, a red dashed box encloses a series of dark bands. The bands are most prominent at the 37 kDa position and extend slightly above and below it.

Uncropped scanned gel pictures for Extended Data Fig 5

Extended Data Fig. 5h -MCP1

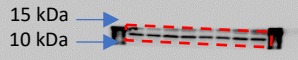

Extended Data Fig. 5h -MIF

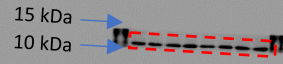

Extended Data Fig. 5h -GAPDH

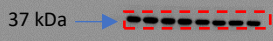

Uncropped scanned gel pictures for Extended Data Fig 5



Extended Data Fig. 7a -CD36

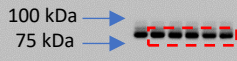

Extended Data Fig. 7a -pFyn

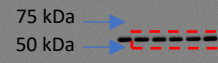

Extended Data Fig. 7a -Fyn

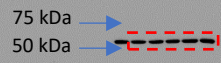

Extended Data Fig. 7a -pJNK

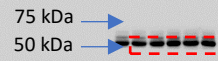

Extended Data Fig. 7a -JNK

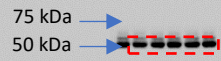

Extended Data Fig. 7a -pp38

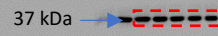

Extended Data Fig. 7a -p38

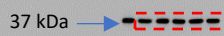

Extended Data Fig. 7a -GAPDH

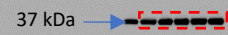

Uncropped scanned gel pictures for Extended Data Fig 7

Extended Data Fig. 7c -CD36

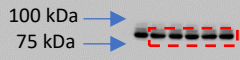

Extended Data Fig. 7c -pFyn

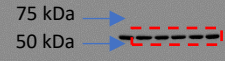

Extended Data Fig. 7c -Fyn

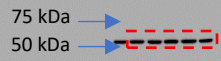

Extended Data Fig. 7c -pJNK

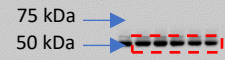

Extended Data Fig. 7c -JNK

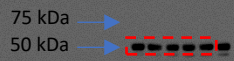

Extended Data Fig. 7c -pp38

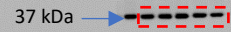

Extended Data Fig. 7c -p38

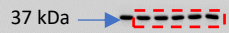

Extended Data Fig. 7c -GAPDH

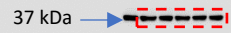

Uncropped scanned gel pictures for Extended Data Fig 7

Extended Data Fig. 8e -iNOS

150 kDa →  
100 kDa →



Extended Data Fig. 8e -GAPDH

37 kDa →



Uncropped scanned gel pictures for Extended Data Fig 7

Extended Data Fig. 8F -iNOS

150 kDa →  
100 kDa →



Extended Data Fig. 8F -GAPDH

37 kDa →



Uncropped scanned gel pictures for Extended Data Fig 7

Extended Data Fig. 8i -MCP1

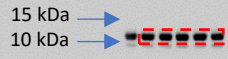

Extended Data Fig. 8i -MIF

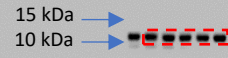

Extended Data Fig. 8i -GAPDH

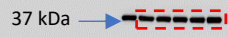

Uncropped scanned gel pictures for Extended Data Fig 7

Extended Data Fig. 8j -MCP1

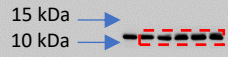

Extended Data Fig. 8j -MIF

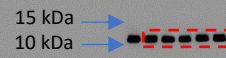

Extended Data Fig. 8j -GAPDH

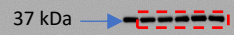

Uncropped scanned gel pictures for Extended Data Fig 7
