# Supplementary material
Source: PubMed Central journal article supplement (PMC9015693)

**Fig. 2d**

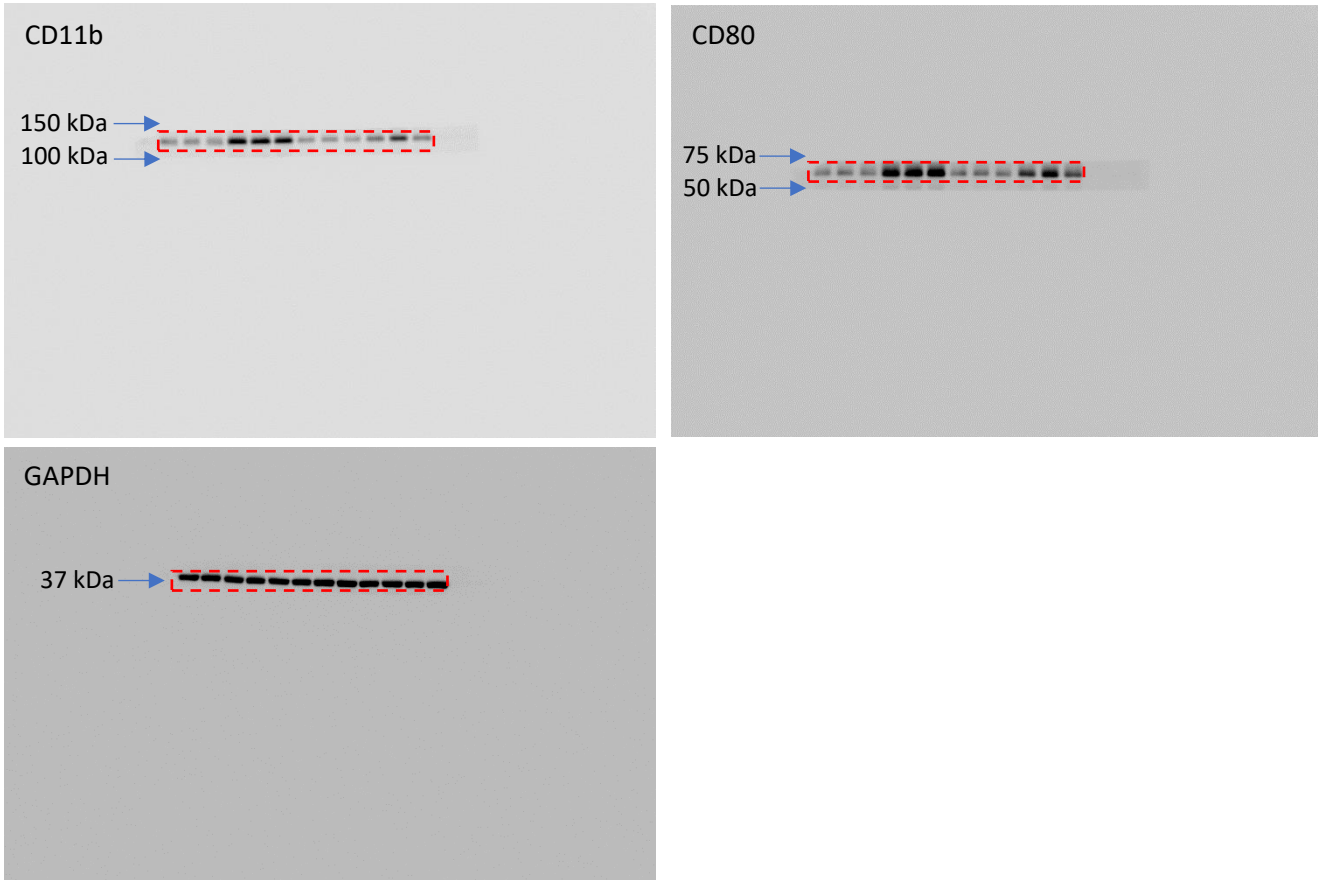

**Fig. 2e**

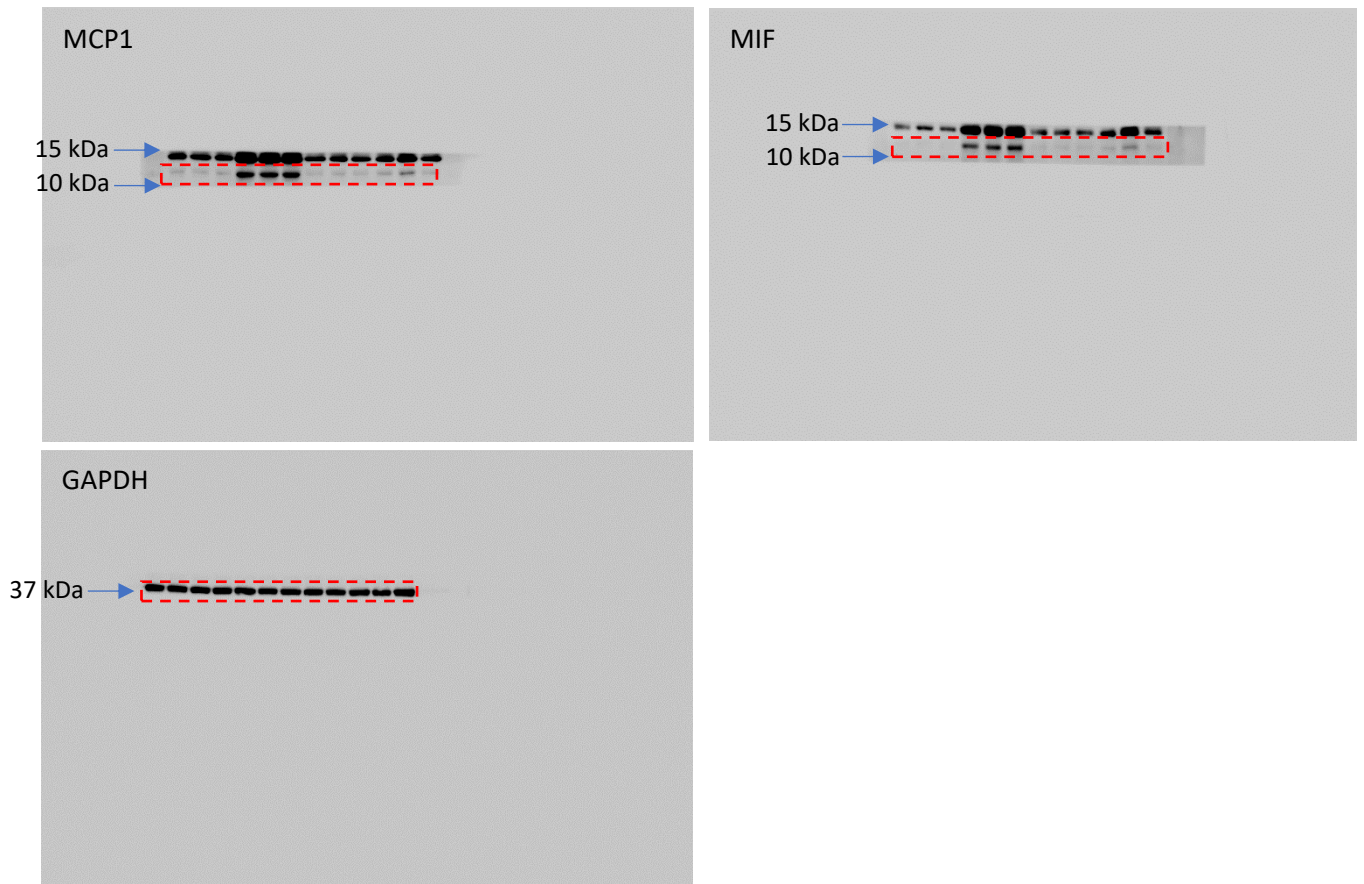

Fig. 2f

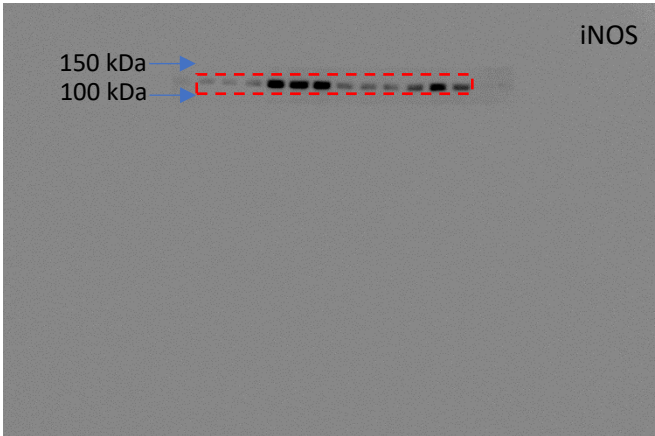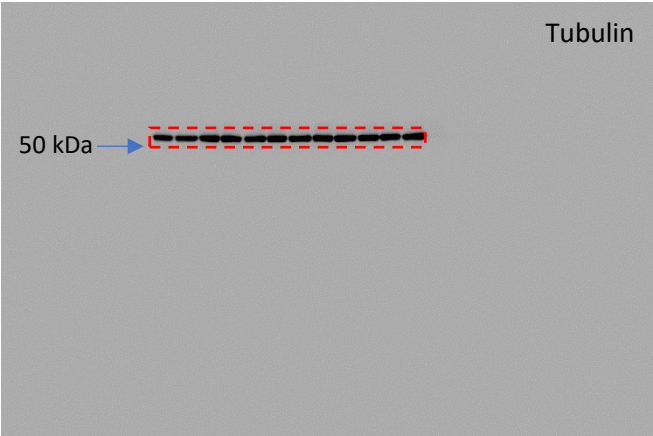

**Fig. 2j**

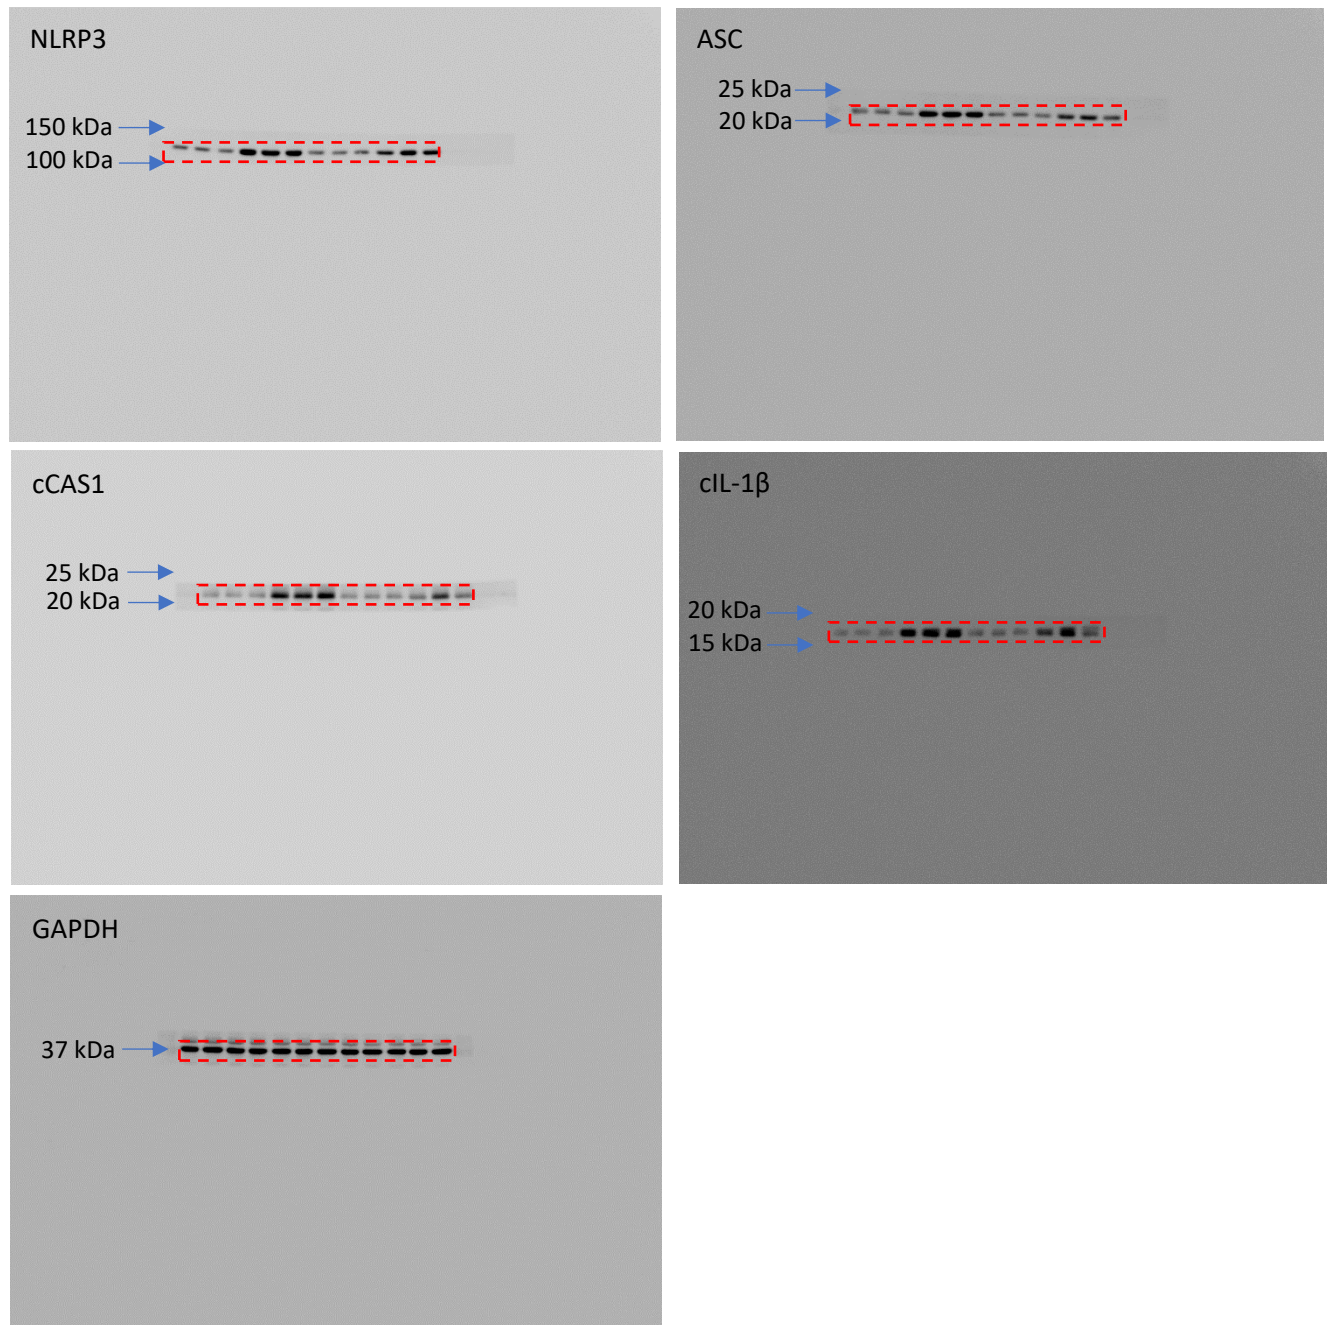

Supplement: NIHMS1776304-supplement-Zong_SourceData_Fig2_uncropped_gels.pdf [file NIHMS1776304-supplement-Zong_SourceData_Fig2_uncropped_gels.pdf]

**Fig. 3I**

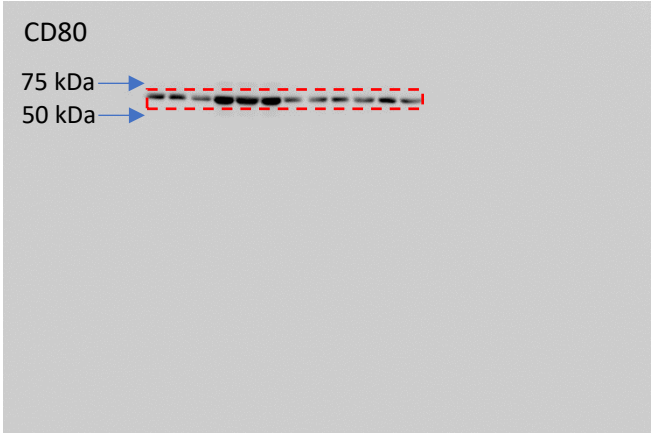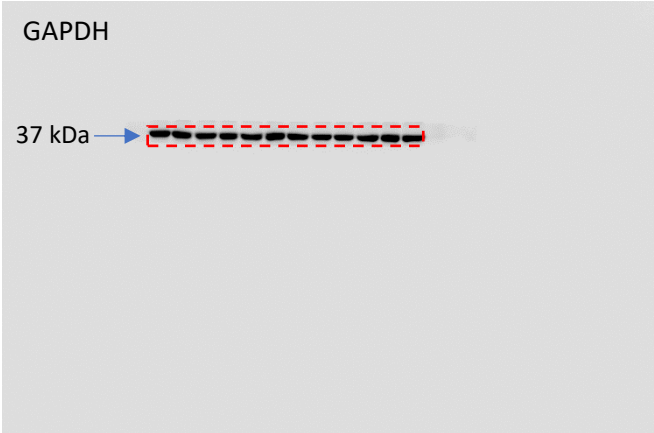

**Fig. 3m**

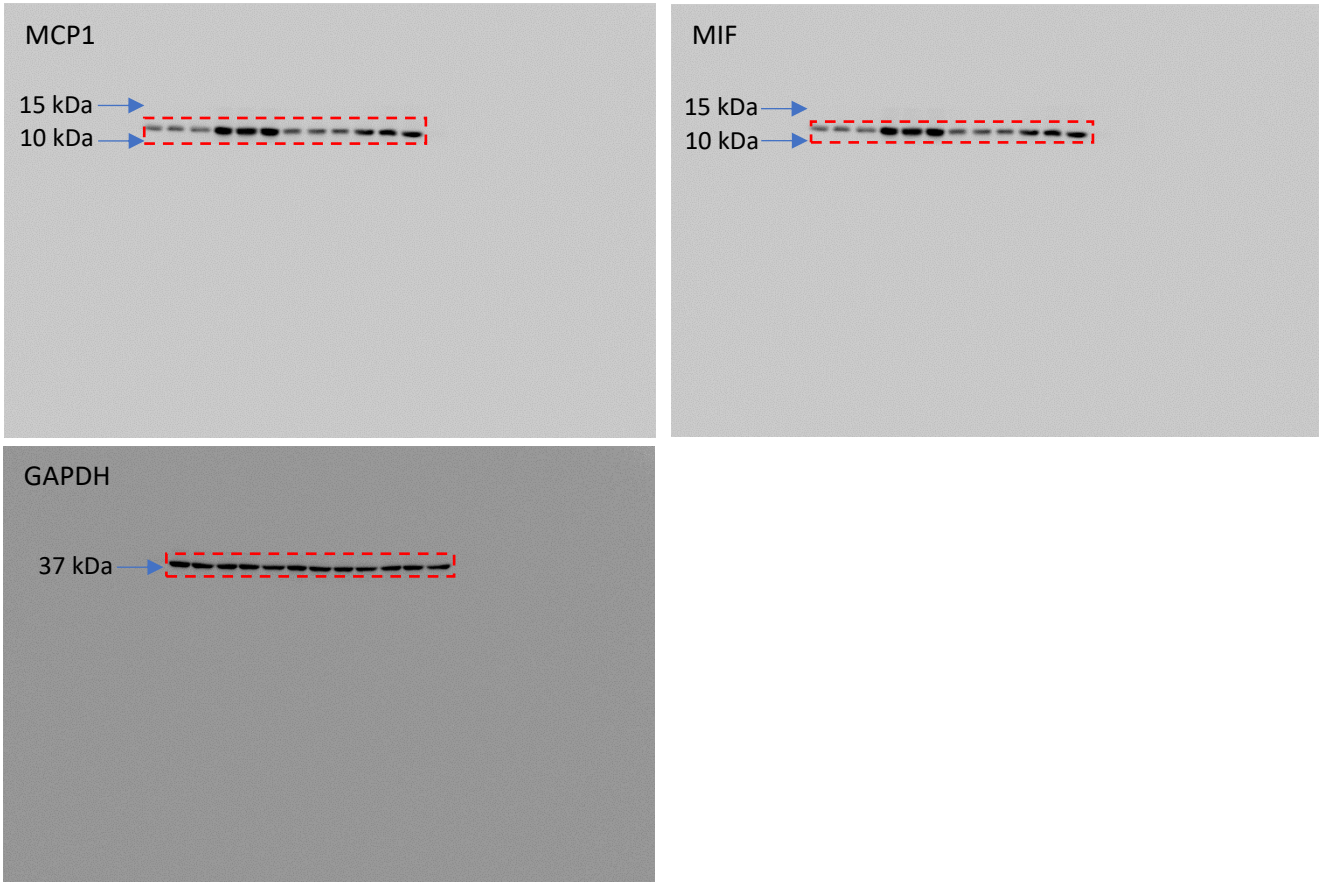

**Fig. 3n**

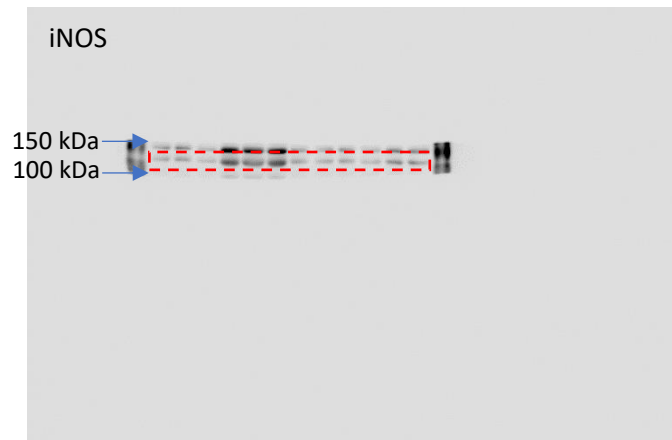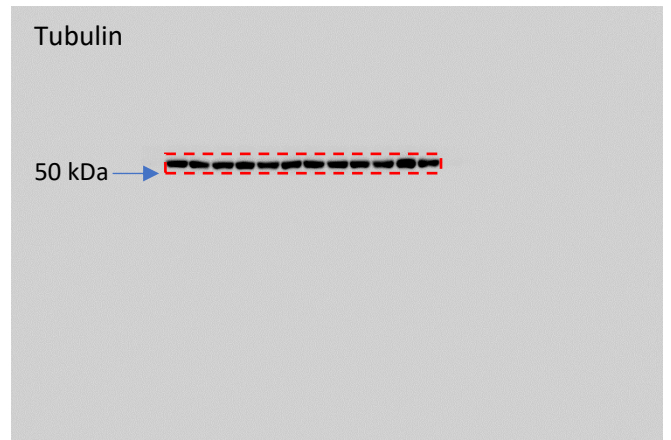

**Fig. 3r**

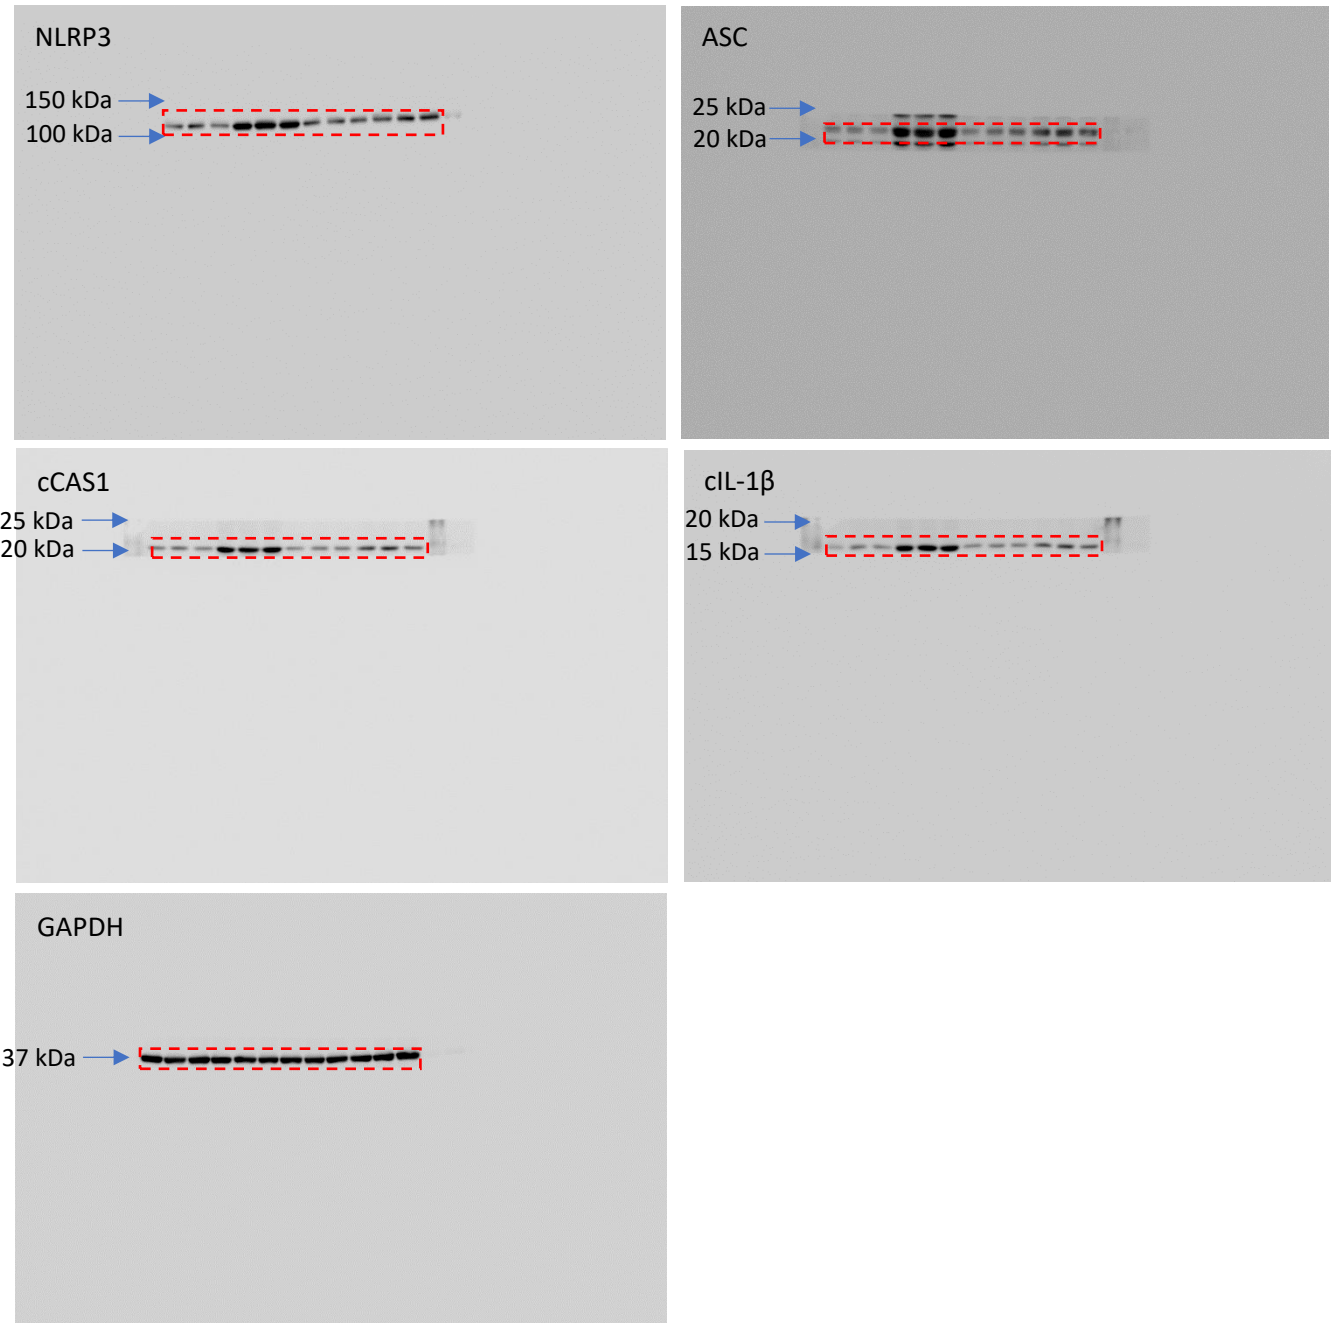

Supplement: NIHMS1776304-supplement-Zong_SourceData_Fig3_uncropped_gels.pdf [file NIHMS1776304-supplement-Zong_SourceData_Fig3_uncropped_gels.pdf]

**Fig. 4c**

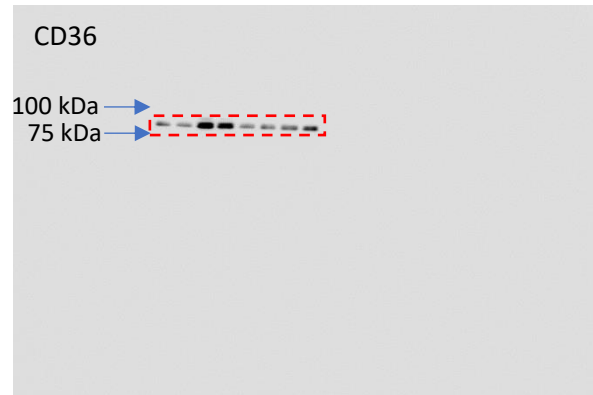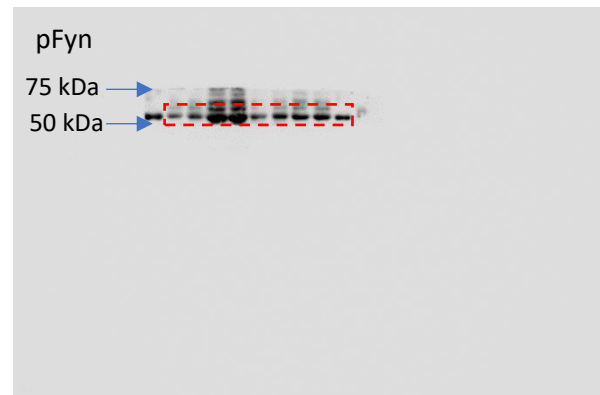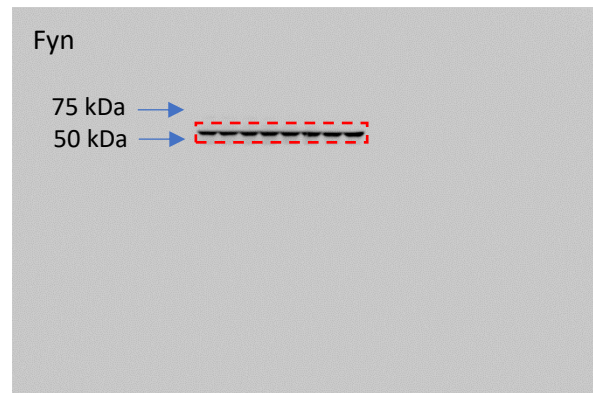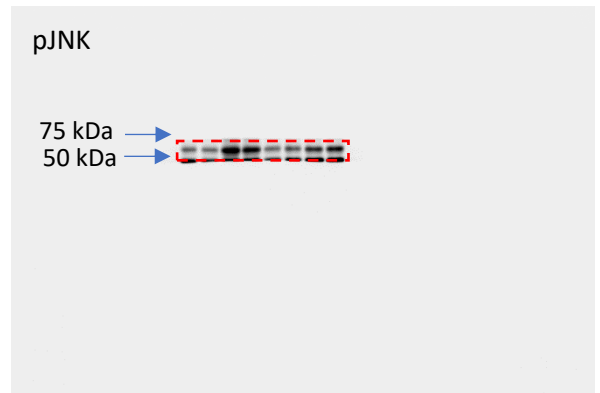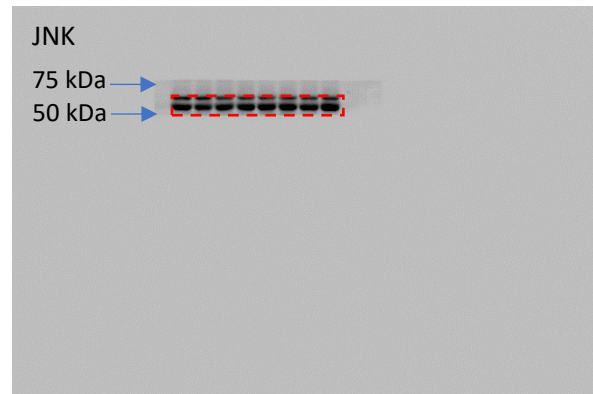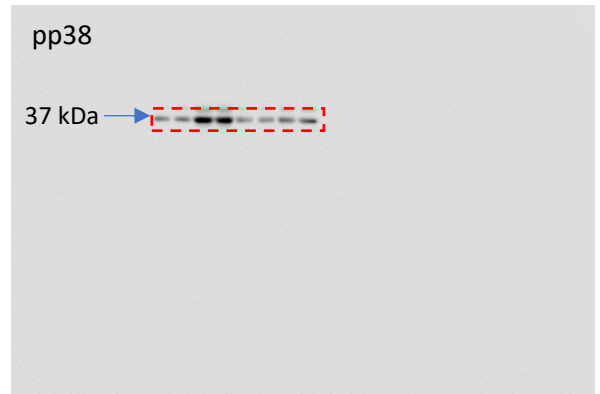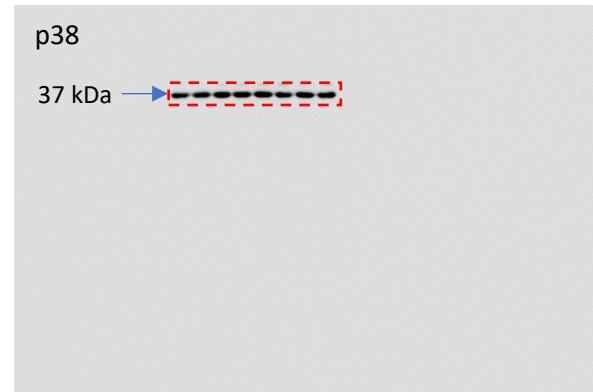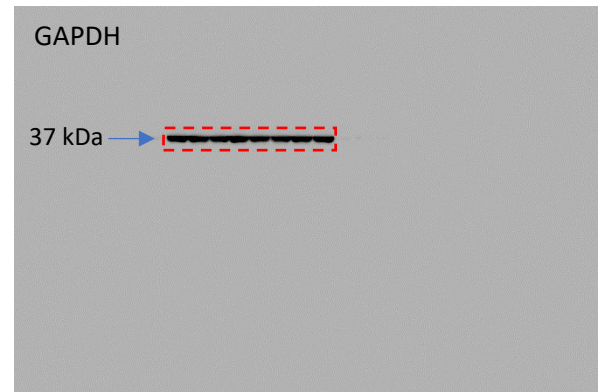

**Fig. 4g**

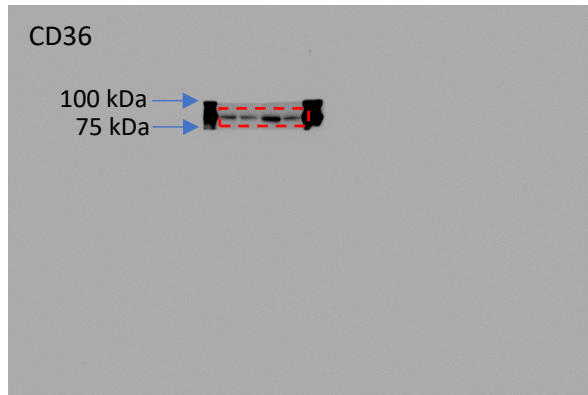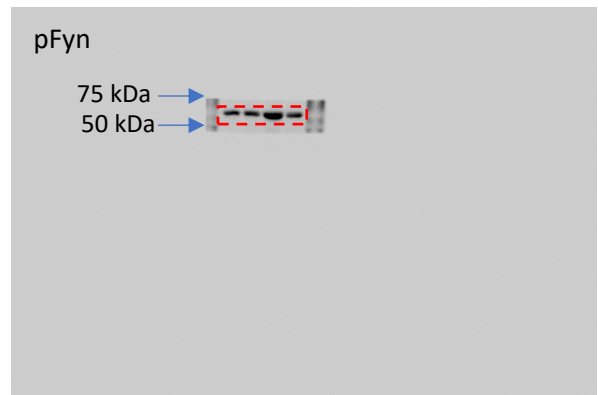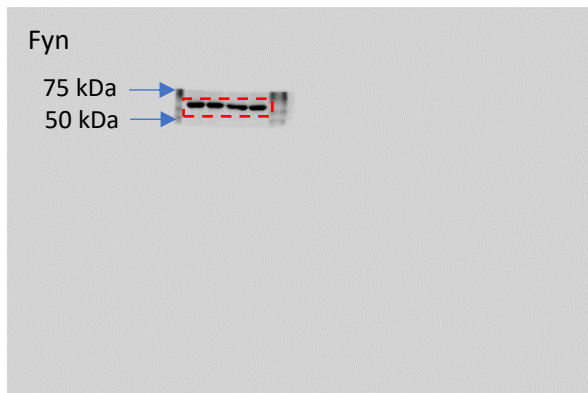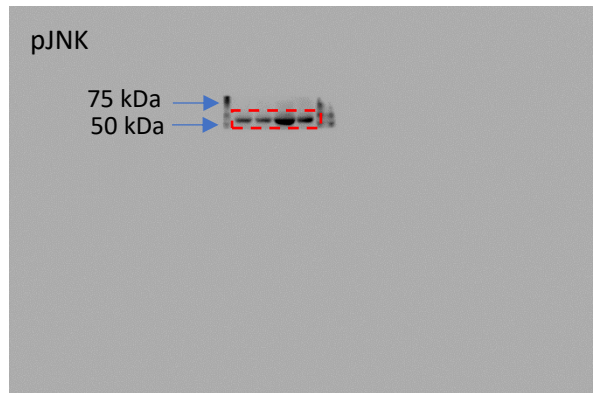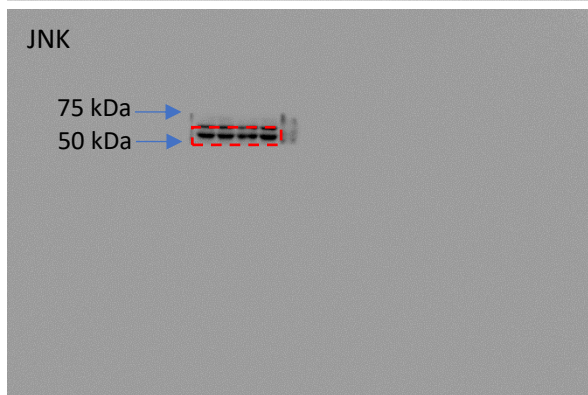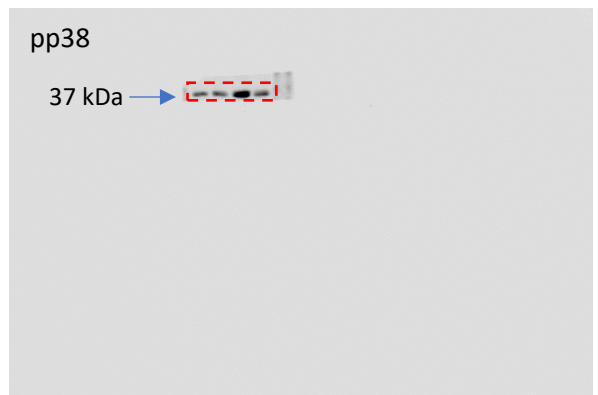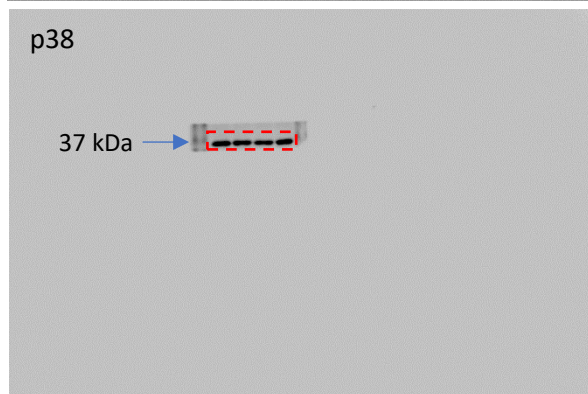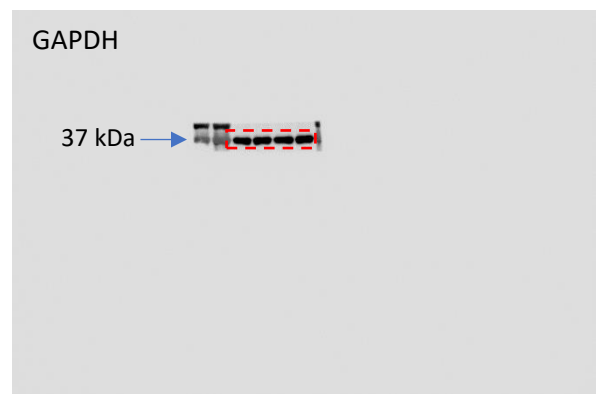

**Fig. 4m**

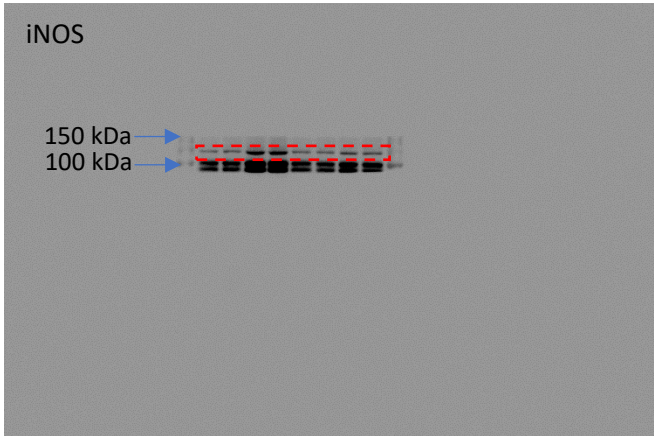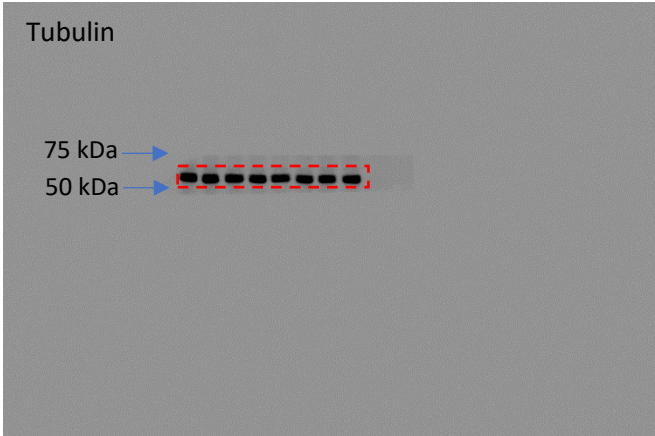

Fig. 4t

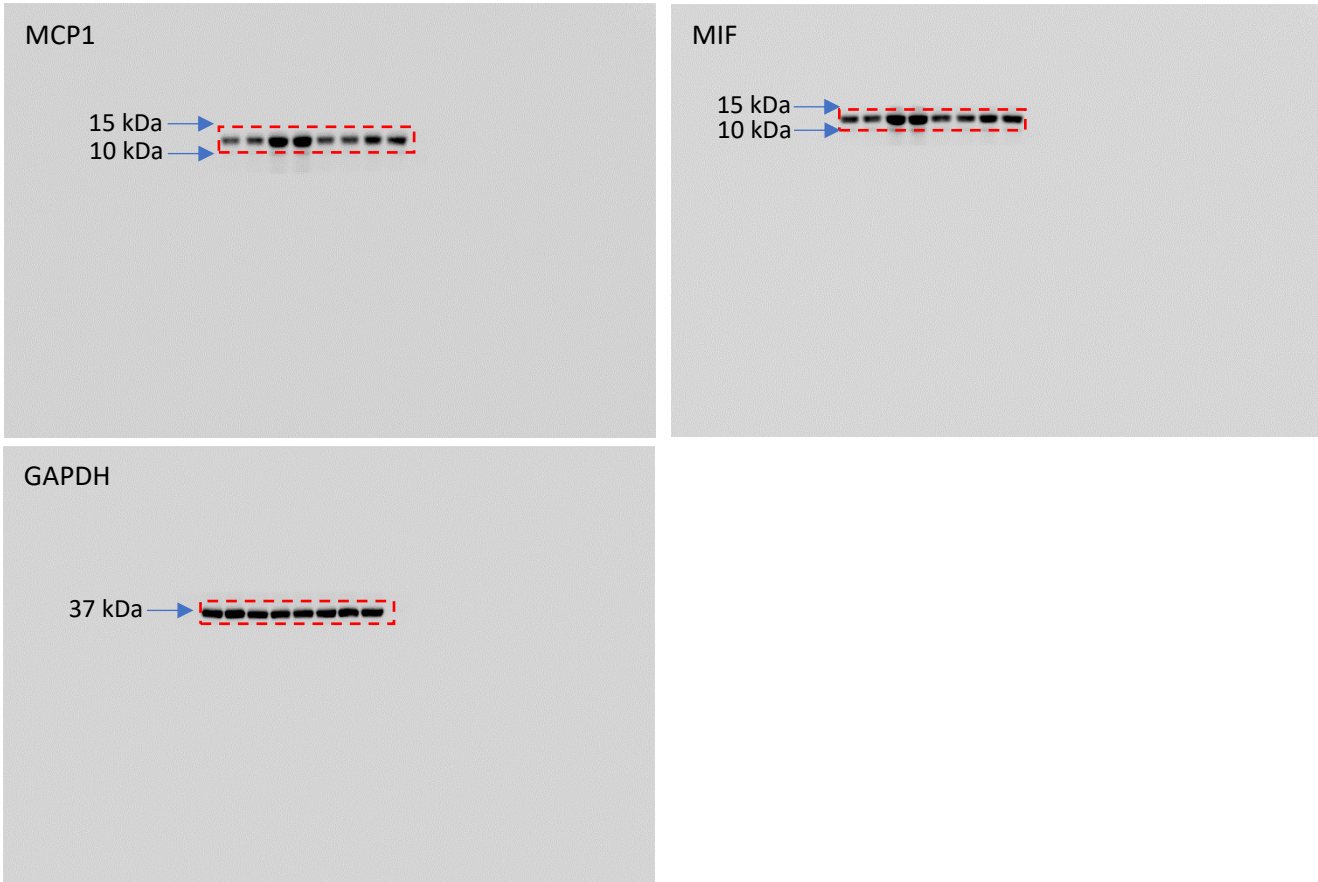

**Fig. 4u**

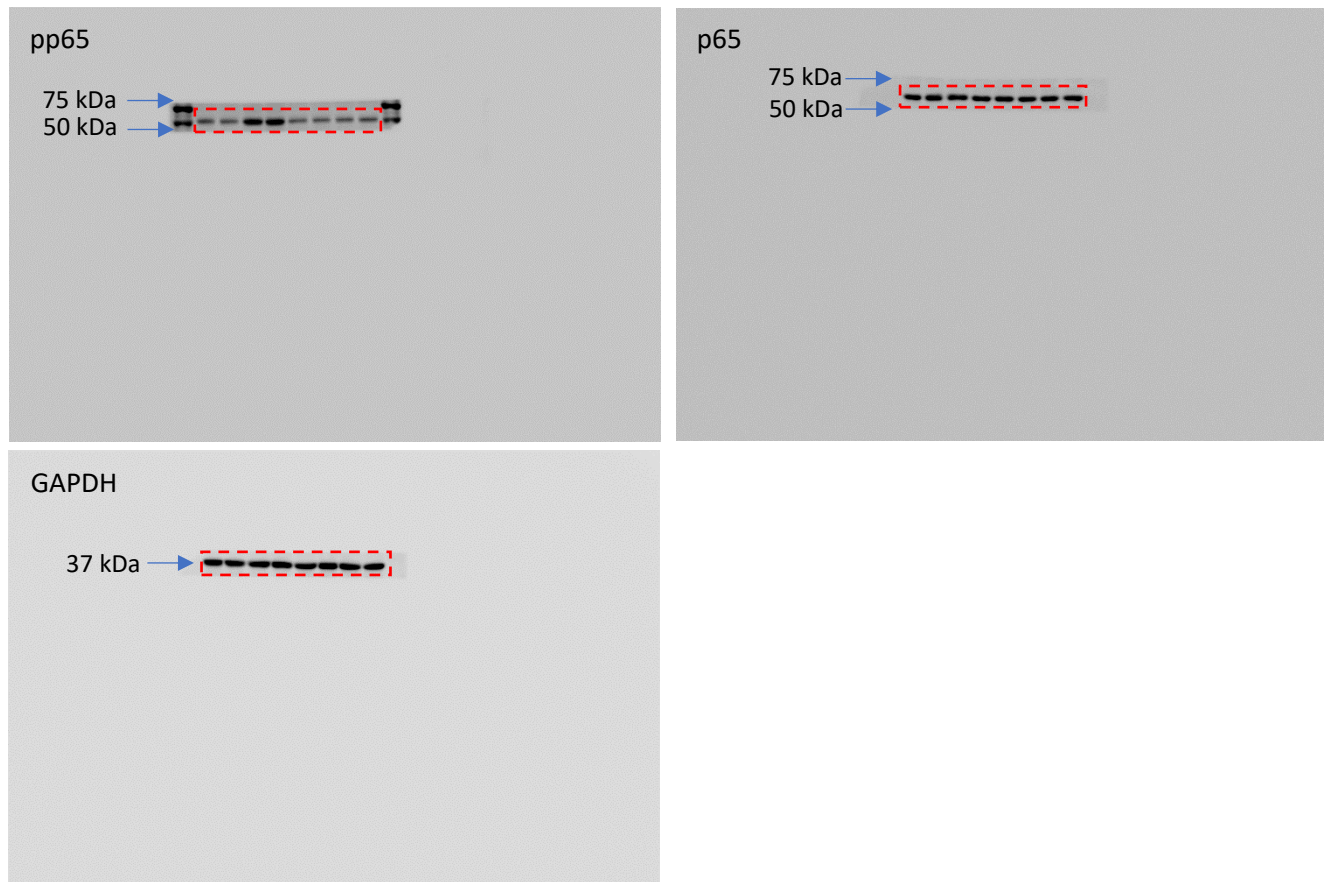

Supplement: NIHMS1776304-supplement-Zong_SourceData_Fig4_uncropped_gels.pdf [file NIHMS1776304-supplement-Zong_SourceData_Fig4_uncropped_gels.pdf]

**Fig. 5a**

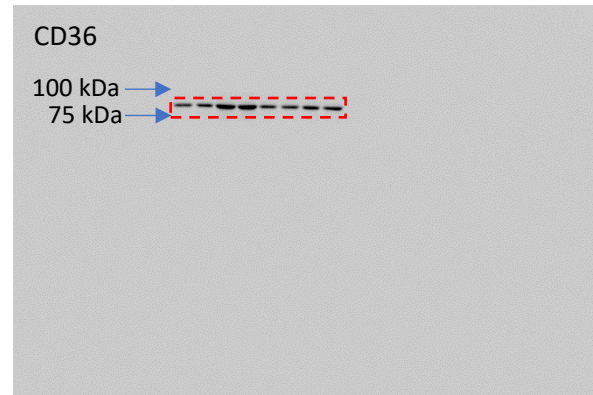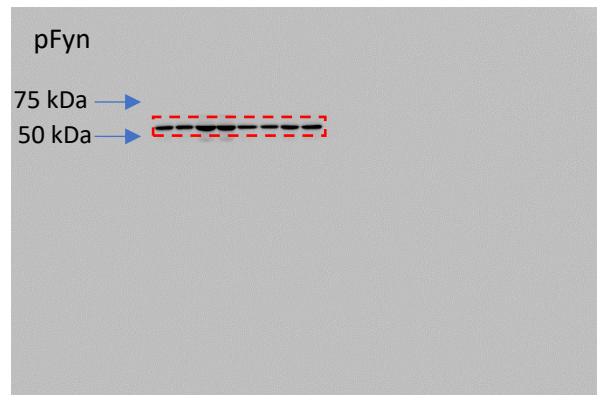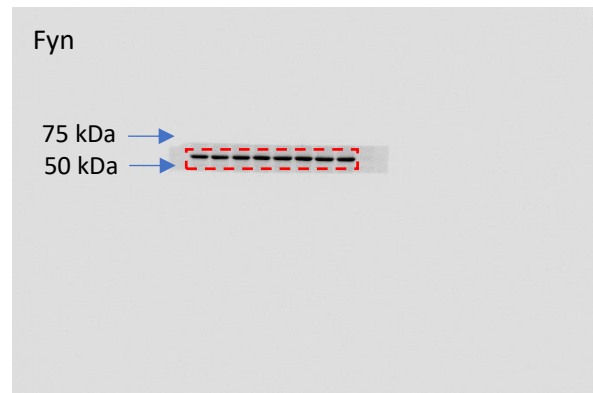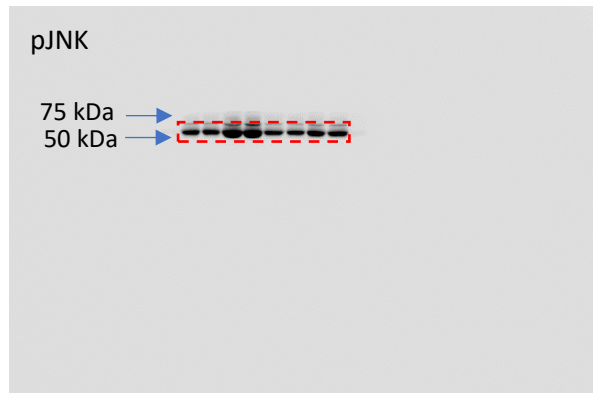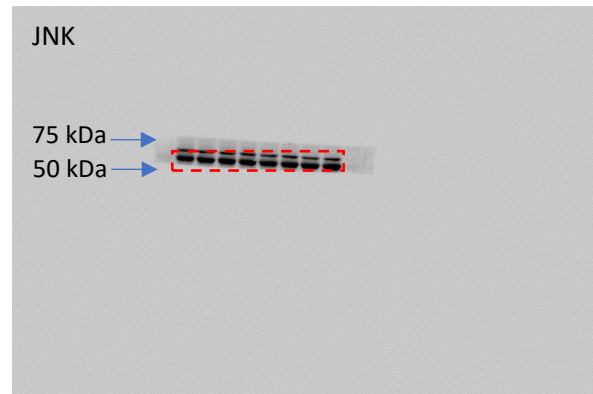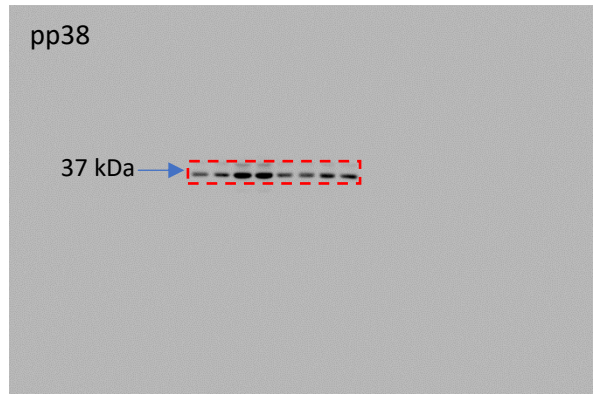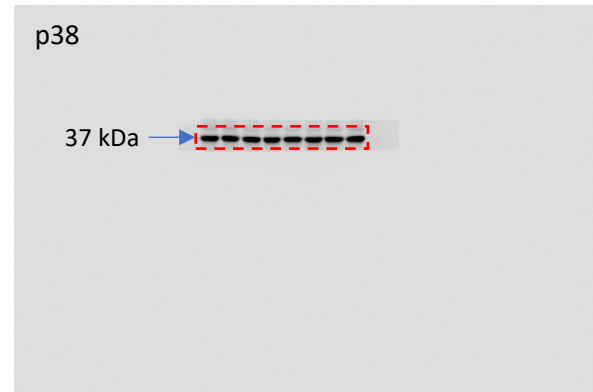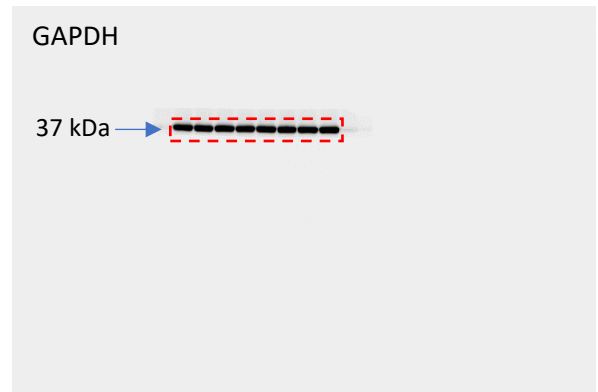

**Fig. 5e**

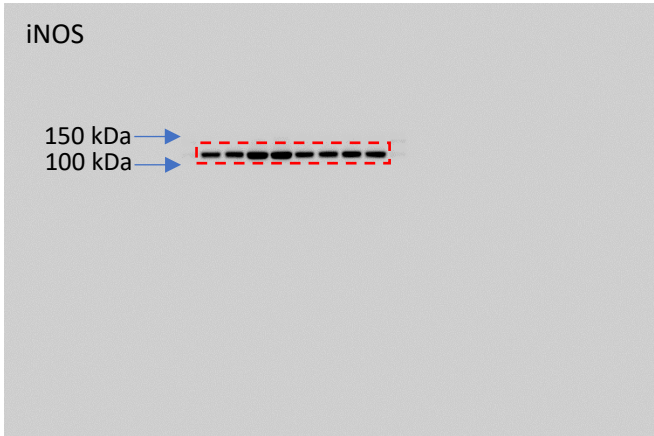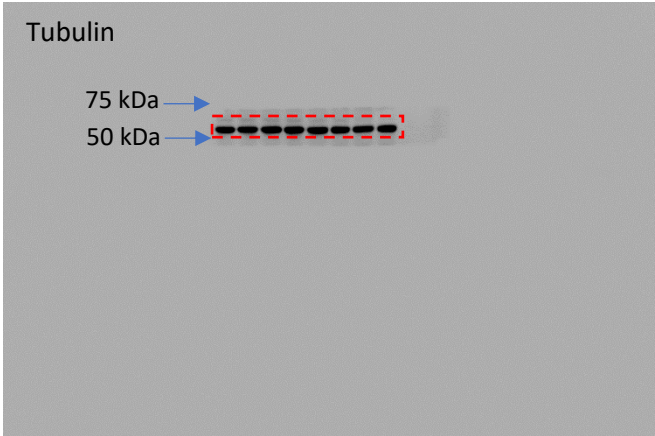

**Fig. 5i**

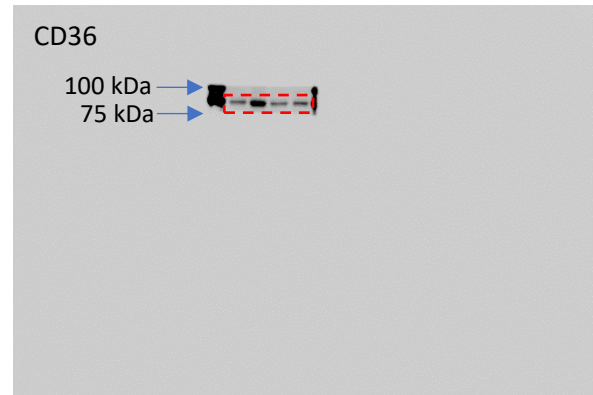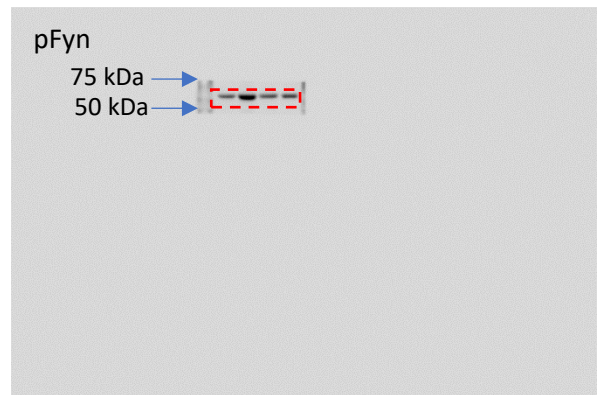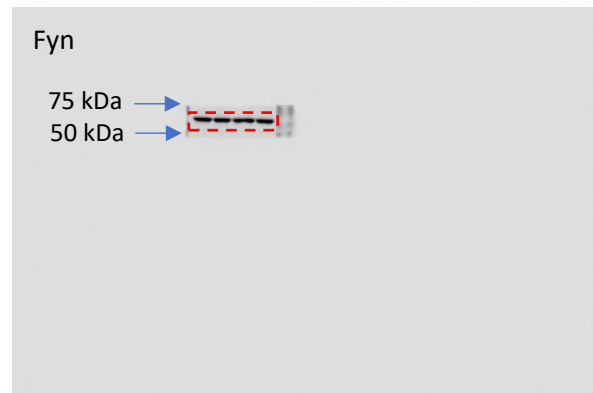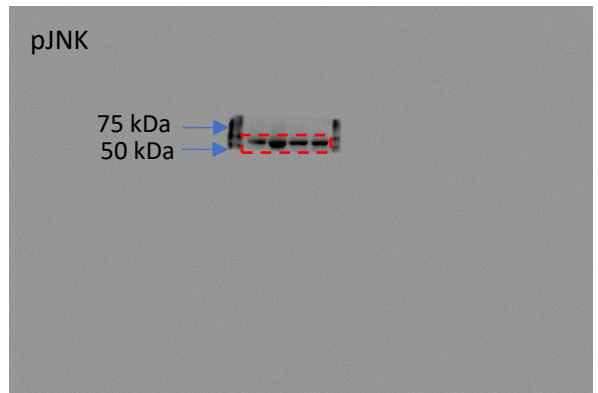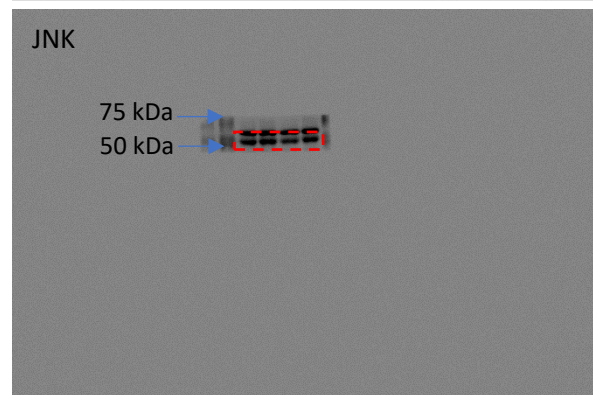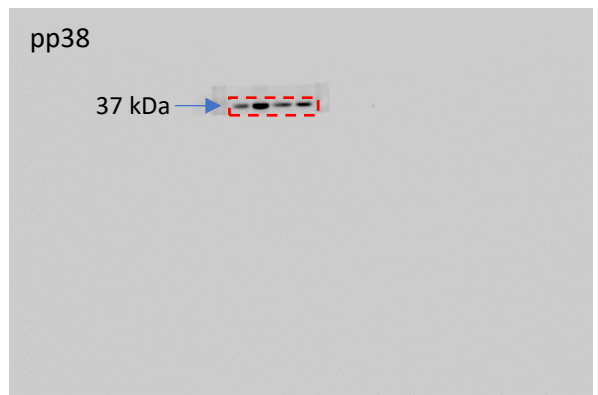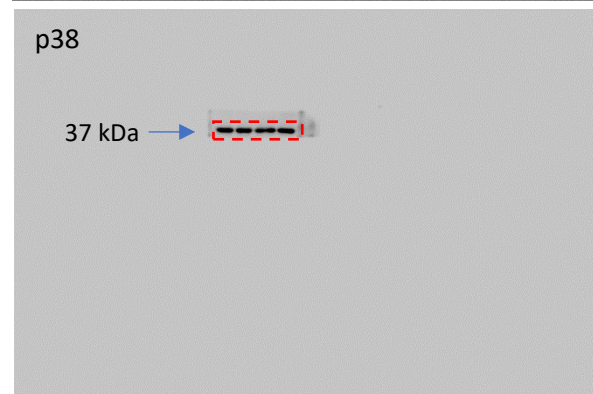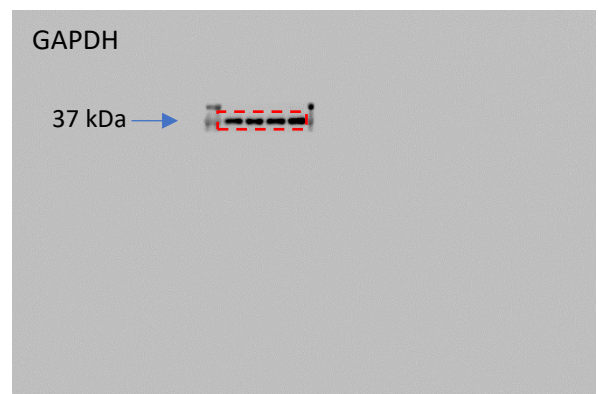

Fig. 5n

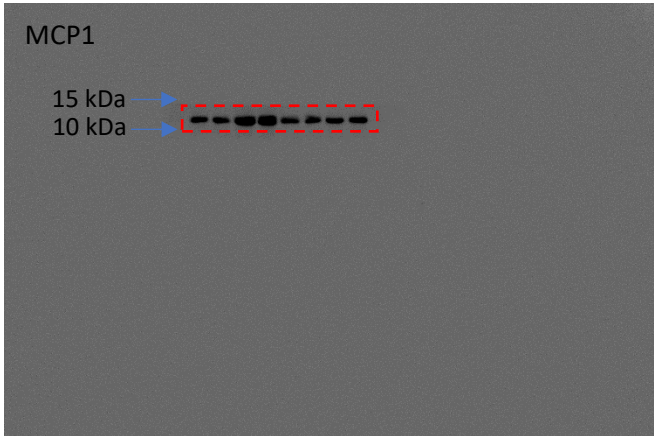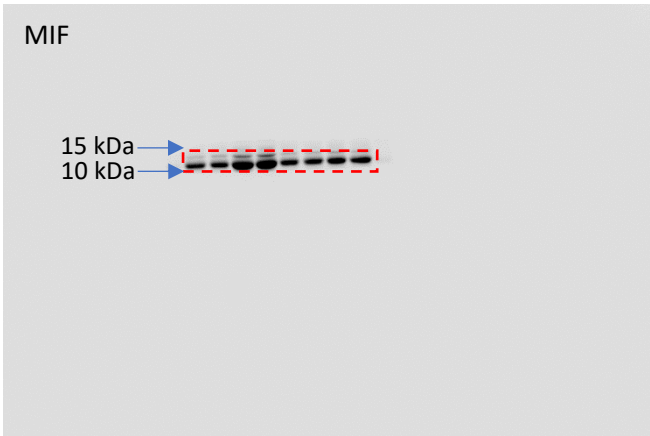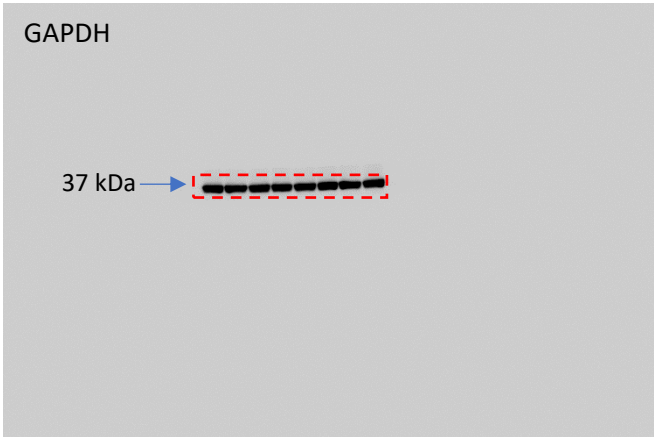

**Fig. 5p**

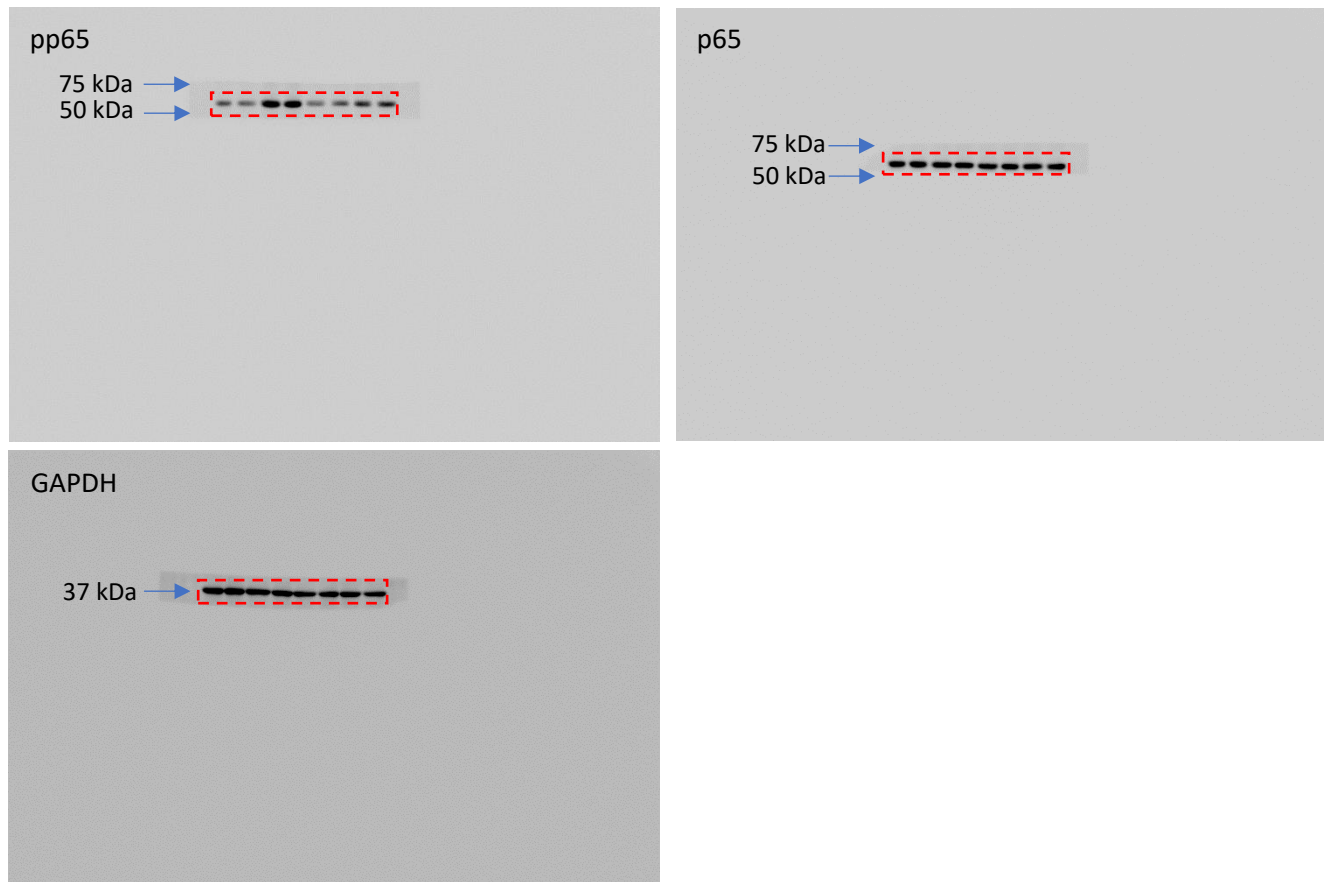

Supplement: NIHMS1776304-supplement-Zong_SourceData_Fig5_uncropped_gels.pdf [file NIHMS1776304-supplement-Zong_SourceData_Fig5_uncropped_gels.pdf]

**Fig. 6d**

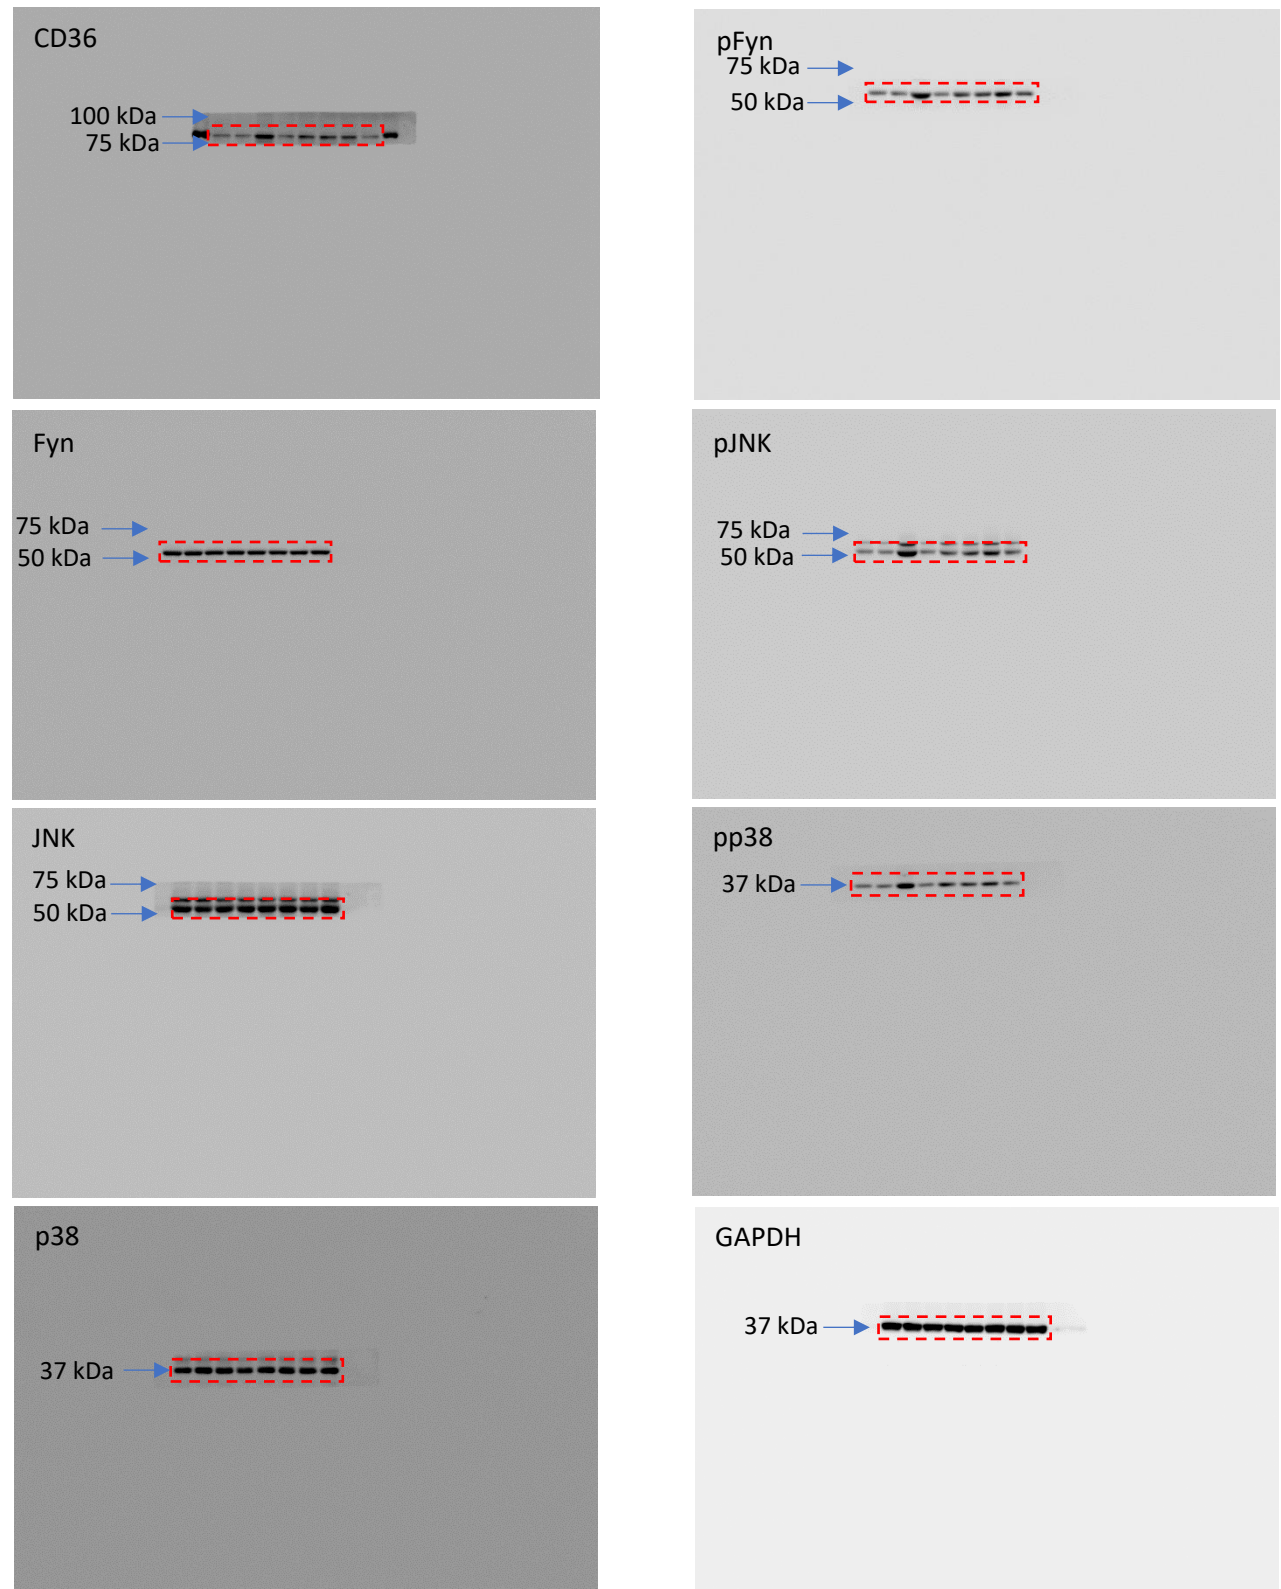

**Fig. 6i**

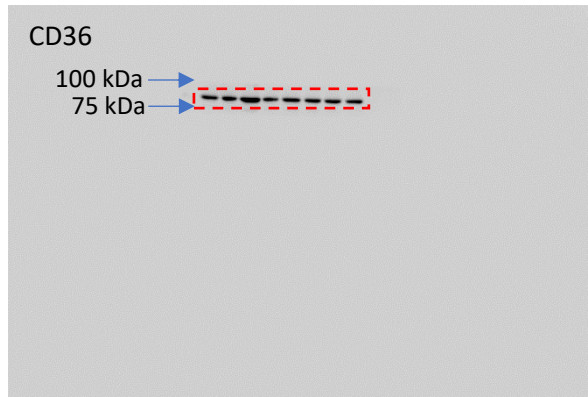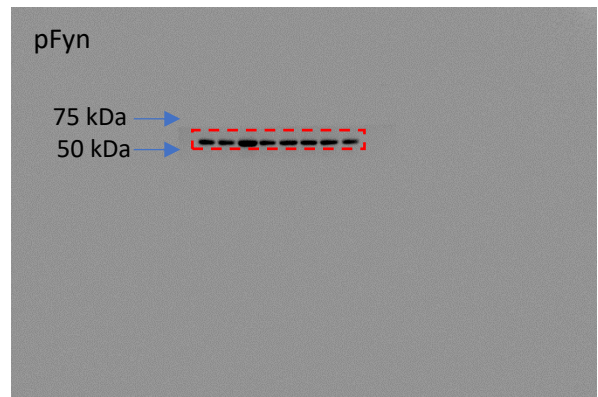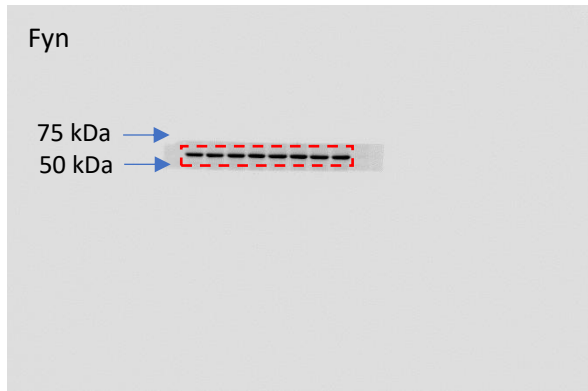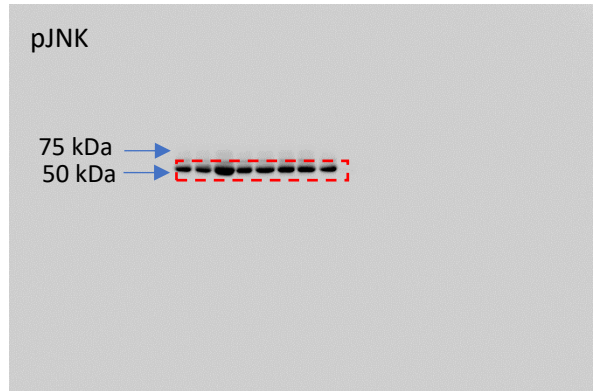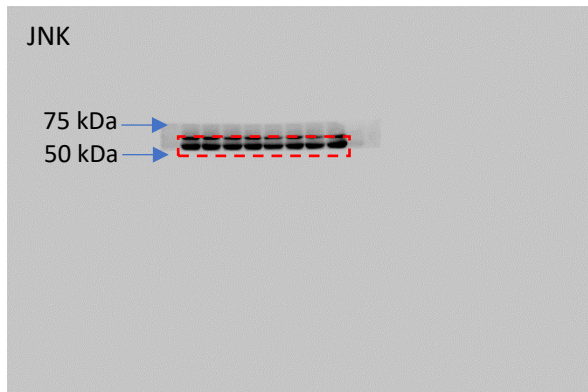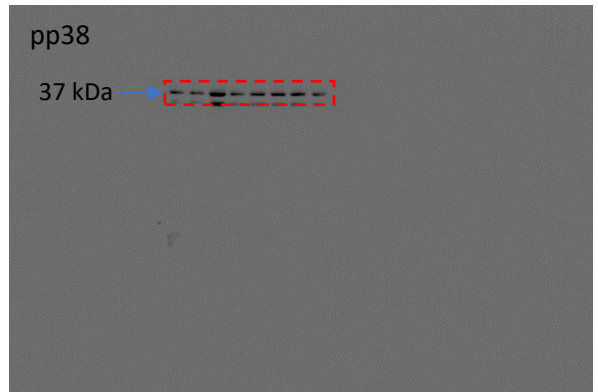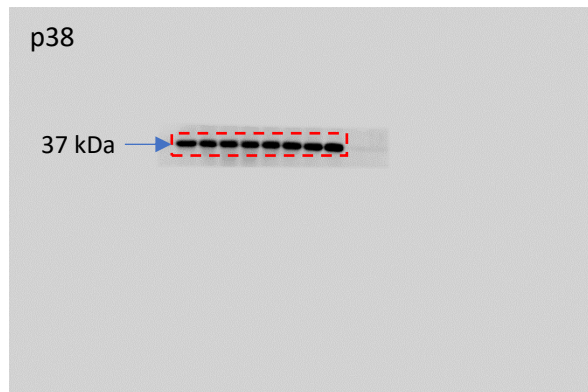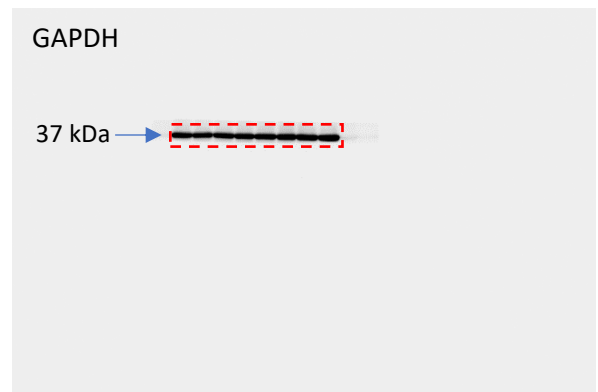

Supplement: NIHMS1776304-supplement-Zong_SourceData_Fig6_uncropped_gels.pdf [file NIHMS1776304-supplement-Zong_SourceData_Fig6_uncropped_gels.pdf]

Fig. 7e

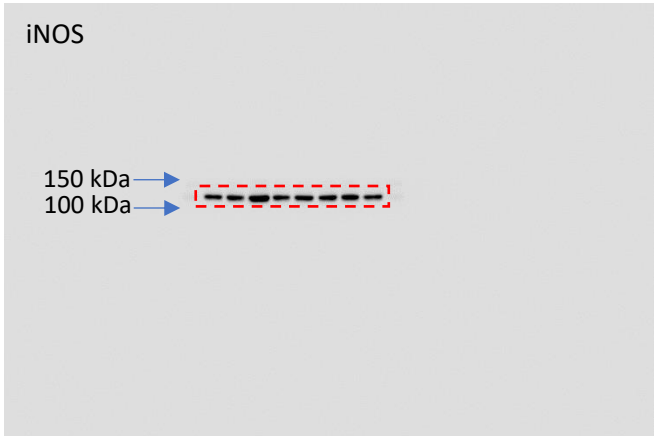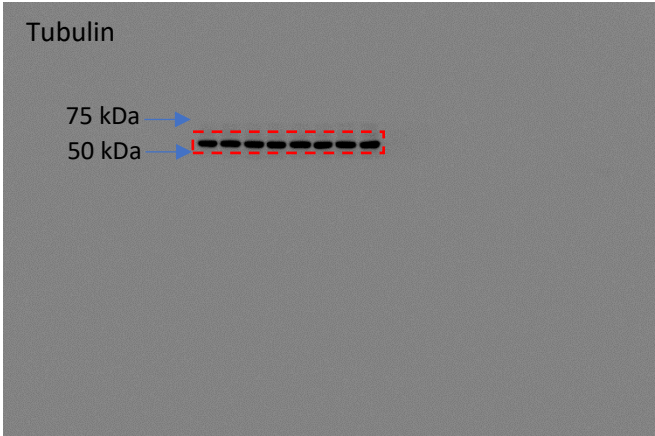

**Fig. 7f**

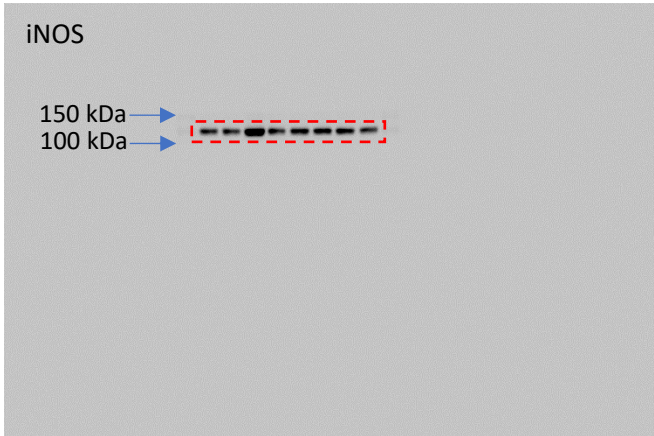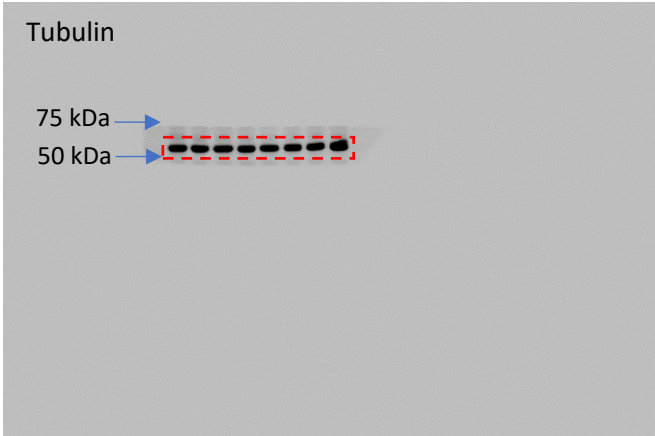

Supplement: NIHMS1776304-supplement-Zong_SourceData_Fig7_uncropped_gels.pdf [file NIHMS1776304-supplement-Zong_SourceData_Fig7_uncropped_gels.pdf]

**Fig. 8c**

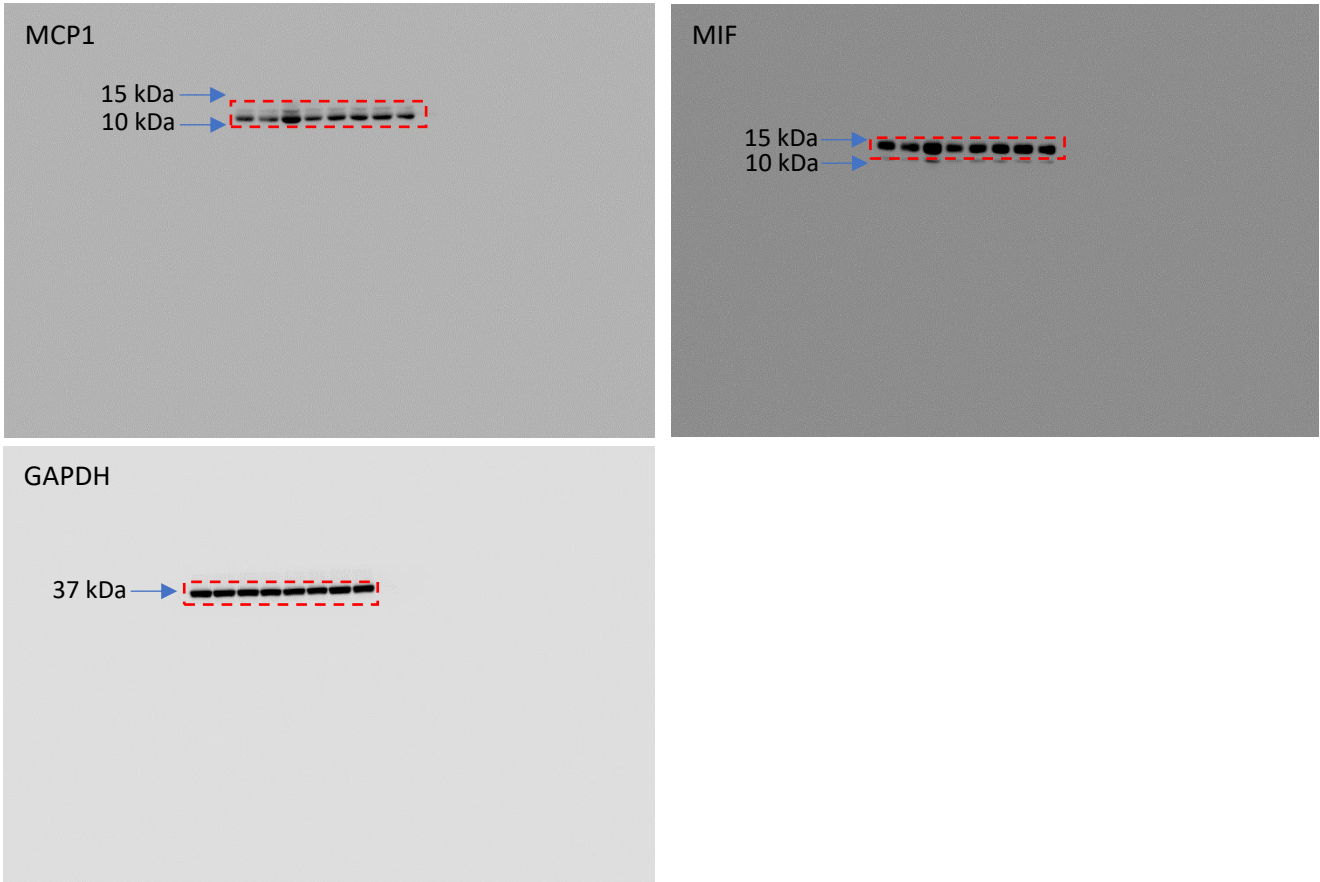

Fig. 8d

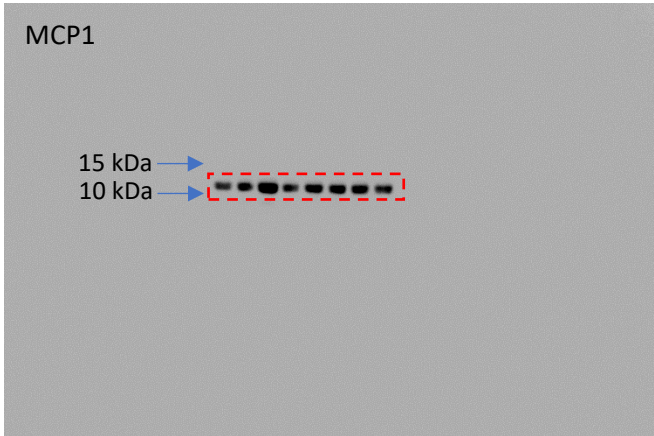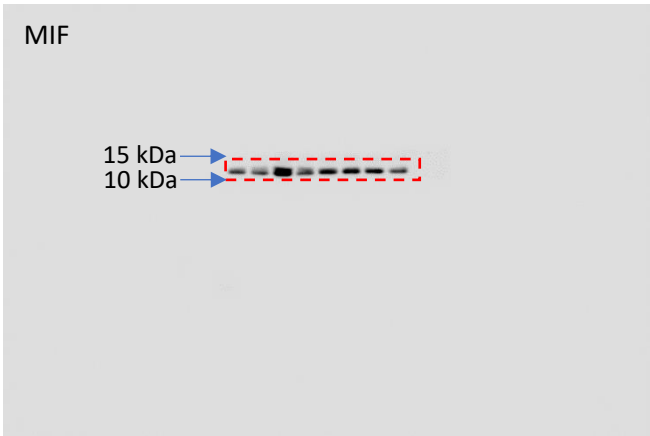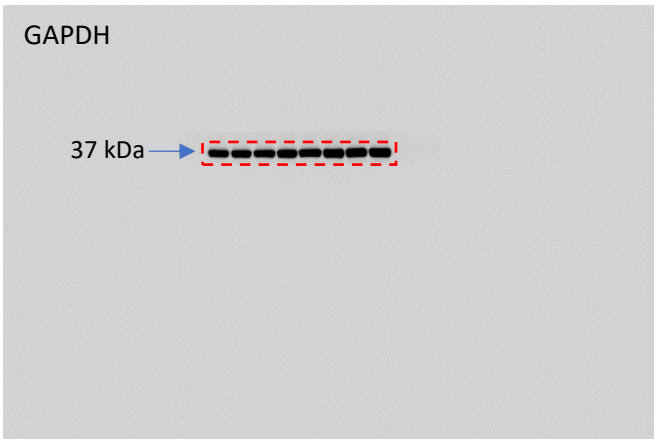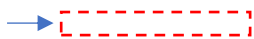

Supplement: NIHMS1776304-supplement-Zong_SourceData_Fig8_uncropped_gels.pdf [file NIHMS1776304-supplement-Zong_SourceData_Fig8_uncropped_gels.pdf]
